# Supplementary material for: Biogenic Selenium Nanoparticles: A Fine Characterization to Unveil Their Thermodynamic Stability
Source: MDPI journal article supplement (doi:10.3390/nano11051195), 2021-05-01
Supplement: s1 [file s1]

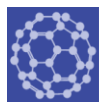

Supplementary material for Article

# Biogenic Selenium Nanoparticles: A Fine Characterization to Unveil Their Thermodynamic Stability

Elena Piacenza <sup>1,\*</sup>, Alessandro Presentato <sup>1,\*</sup>, Francesco Ferrante <sup>2</sup>, Giuseppe Cavallaro <sup>2</sup>, Rosa Alduina <sup>1</sup> and Delia F. Chillura Martino <sup>1</sup>

<sup>1</sup> Department of Biological, Chemical, and Pharmaceutical Sciences and Technologies (STEBICEF), University of Palermo, Viale delle Scienze Ed. 16, 90128, Palermo, Italy; elena.piacenza91@gmail.com; alessandro.presentato@unipa.it; valeria.alduina@unipa.it; delia.chilluramartino@unipa.it

<sup>2</sup> Department of Physics and Chemistry “Emilio Segrè” (DIFC), University of Palermo, Viale delle Scienze Ed. 17, 90128, Palermo, Italy; francesco.ferrante@unipa.it; giuseppe.cavallaro@unipa.it

\* Correspondence: elena.piacenza91@gmail.com; alessandro.presentato@unipa.it

**Citation:** Piacenza, E.; Presentato, A.; Ferrante, F.; Cavallaro, G.; Alduina, R.; Chillura Martino, D.F. Biogenic Selenium Nanoparticles: A Fine Characterization to Unveil Their Thermodynamic Stability. *Nanomaterials* **2021**, *11*, 1195. <https://doi.org/10.3390/nano11051195>

Academic Editor: Andrés Guerrero-Martínez

Received: 13 April 2021

Accepted: 29 April 2021

Published: 1 May 2021

**Publisher’s Note:** MDPI stays neutral with regard to jurisdictional claims in published maps and institutional affiliations.

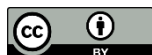

**Copyright:** © 2021 by the authors. Submitted for possible open access publication under the terms and conditions of the Creative Commons Attribution (CC BY) license (<http://creativecommons.org/licenses/by/4.0/>).

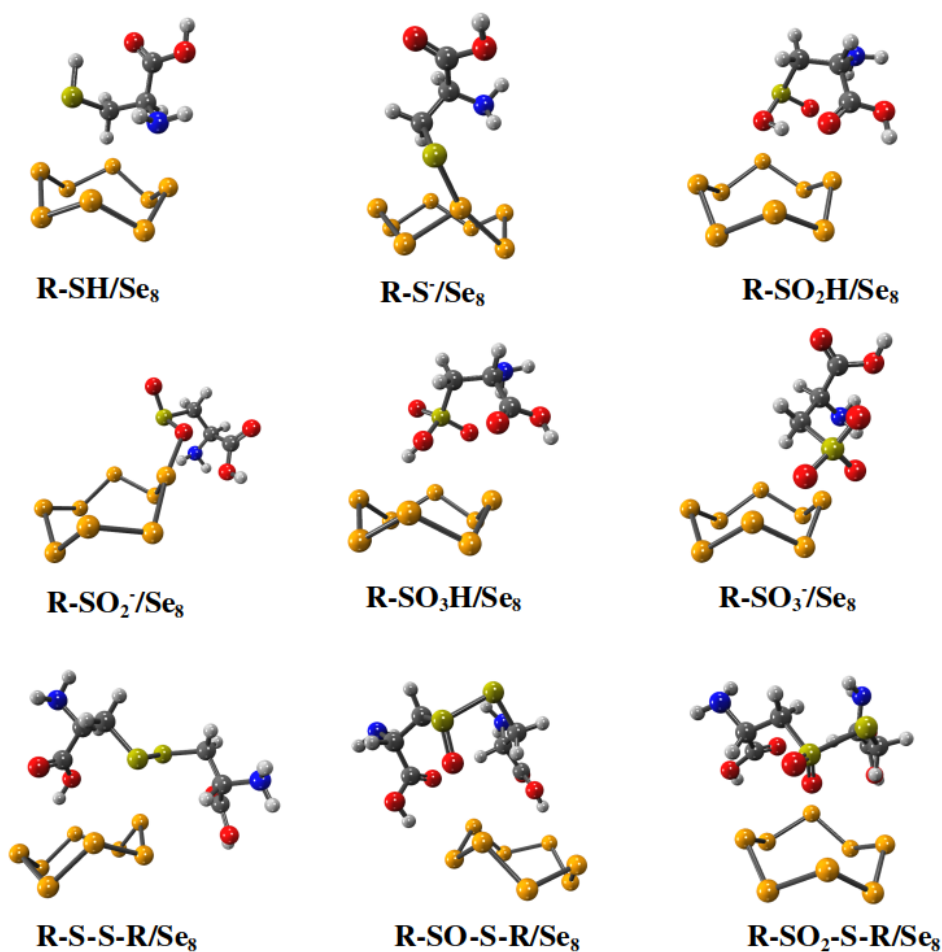

**Figure S1:** Thiol (RSH)-containing and deriving species on which Density Functional Theory (DFT) calculations were performed, either as isolated molecules or interacting with a Se<sub>8</sub> unit, where R-S<sup>-</sup>, R-SO<sub>2</sub>H, R-SO<sub>2</sub><sup>-</sup>, R-SO<sub>3</sub>H, R-SO<sub>3</sub><sup>-</sup>, R-S-S-R, R-SO-S-R, and R-SO<sub>2</sub>-S-R represent thiolate, sulfinic acid, sulfinate, sulfonic acid, sulfonate, disulfide, disulfide monoxide, and disulfide dioxide moieties, respectively.

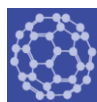**Table S1.** Density Functional Theory (DFT) calculations for IR vibrations performed considering free RSH-containing molecules (*i.e.*, L-cysteine and its derivatives) and their adsorption on Se<sub>8</sub> nuclei.

| Vibrational modes           | $\tilde{\nu}$ (cm <sup>-1</sup> ) |                      |                  |                                   |                     |                                     |                                |                                                 |                     |                                     |                                |                                                 |
|-----------------------------|-----------------------------------|----------------------|------------------|-----------------------------------|---------------------|-------------------------------------|--------------------------------|-------------------------------------------------|---------------------|-------------------------------------|--------------------------------|-------------------------------------------------|
|                             | R-SH                              | R-SH/Se <sub>8</sub> | R-S <sup>-</sup> | R-S <sup>-</sup> /Se <sub>8</sub> | R-SO <sub>2</sub> H | R-SO <sub>2</sub> H/Se <sub>8</sub> | R-SO <sub>2</sub> <sup>-</sup> | R-SO <sub>2</sub> <sup>-</sup> /Se <sub>8</sub> | R-SO <sub>3</sub> H | R-SO <sub>3</sub> H/Se <sub>8</sub> | R-SO <sub>3</sub> <sup>-</sup> | R-SO <sub>3</sub> <sup>-</sup> /Se <sub>8</sub> |
| $\nu$ (S)OH                 |                                   |                      |                  |                                   | 3449                | 3485                                |                                |                                                 |                     | 3555                                |                                |                                                 |
| $\nu$ (NH <sub>2</sub> )    | 3456                              | 3456                 | 3495             | 3534                              | 3543                | 3545                                | 3485                           | 3515                                            | 3547                | 3548                                | 3521                           | 3533                                            |
|                             |                                   |                      | 3253             | 3447                              | 3462                | 3461                                | 3379                           | 3446                                            | 3473                | 3473                                | 3240                           | 3423                                            |
| $\nu$ (CH <sub>2</sub> )    | 3149                              | 3161                 | 3011             | 3119                              | 3148                | 3149                                | 3127                           | 3137                                            | 3183                | 3182                                | 3140                           | 3112                                            |
|                             | 3086                              | 3099                 | 2950             | 3058                              | 3077                | 3077                                | 3036                           | 3059                                            | 3102                |                                     | 3068                           | 3081                                            |
| $\nu$ (CH)                  | 2986                              | 2984                 | 2927             | 2988                              | 2997                | 2994                                | 2949                           | 2993                                            | 3015                | 3012                                | 2952                           | 2991                                            |
| $\nu$ (CO)                  | 1816                              | 1819                 | 1801             | 1817                              | 1780                | 1778                                | 1805                           | 1823                                            | 1831                | 1819                                | 1814                           | 1821                                            |
| $\delta$ (NH <sub>2</sub> ) | 1664                              | 1638                 | 1635             | 1646                              | 1654                | 1652                                | 1665                           | 1667                                            | 1669                | 1662                                | 1672                           | 1655                                            |
|                             | 958                               | 962                  | 1270             | 1151                              | 963                 | 961                                 | 1124                           | 987                                             | 947                 | 953                                 | 1400                           | 1398                                            |
|                             | 934                               | 933                  | 1014             | 973                               | 400                 |                                     | 1021                           |                                                 | 892                 |                                     | 1230                           | 994                                             |
|                             |                                   |                      |                  | 950                               |                     |                                     | 788                            |                                                 |                     |                                     | 1002                           | 965                                             |
|                             |                                   |                      |                  | 880                               |                     |                                     |                                |                                                 |                     |                                     | 971                            |                                                 |
| $\delta$ (CH <sub>2</sub> ) | 1423                              | 1423                 | 1430             | 1419                              | 1423                | 1421                                | 1419                           | 1406                                            | 1410                | 1409                                | 1412                           | 1417                                            |
|                             | 1297                              | 1300                 | 1139             | 1286                              | 1267                | 1270                                | 1247                           | 1263                                            | 1301                | 1307                                | 1290                           | 1301                                            |
|                             | 1257                              | 1257                 | 1121             | 1233                              | 1238                | 1153                                | 1203                           | 1216                                            | 1236                | 1284                                | 1191                           | 1240                                            |
|                             | 1164                              | 1163                 | 892              | 1132                              | 1130                | 1131                                | 1106                           | 1135                                            | 1142                | 1234                                | 1167                           | 1126                                            |
|                             |                                   | 1142                 | 814              | 809                               | 992                 | 992                                 | 955                            | 1115                                            | 1007                | 1175                                | 1108                           | 1067                                            |
|                             |                                   |                      |                  |                                   | 864                 | 865                                 | 851                            | 967                                             | 823                 | 1007                                | 892                            | 897                                             |
|                             |                                   |                      |                  |                                   | 853                 | 833                                 |                                | 881                                             |                     | 823                                 | 827                            | 827                                             |
|                             |                                   |                      |                  |                                   |                     |                                     |                                | 819                                             |                     |                                     |                                |                                                 |
| $\delta$ (CH)               | 1389                              | 1389                 | 1322             | 1374                              | 1396                | 1395                                | 1390                           | 1375                                            | 1394                | 1392                                | 1332                           | 1321                                            |
|                             |                                   |                      |                  |                                   |                     | 1303                                | 1298                           | 1312                                            |                     | 1292                                | 1137                           | 1169                                            |
|                             |                                   |                      |                  |                                   |                     |                                     |                                | 456                                             |                     |                                     |                                |                                                 |
| $\delta$ (OH)               | 1373                              | 1373                 | 1349             | 1358                              | 1391                | 1389                                | 1354                           | 1361                                            | 1378                | 1376                                | 1363                           | 1367                                            |
|                             | 1309                              | 1308                 | 1204             | 1183                              | 1188                | 1189                                | 1161                           | 1184                                            | 1187                | 1188                                | 1187                           | 1194                                            |
|                             | 1179                              | 1175                 | 1178             | 747                               | 755                 | 755                                 | 735                            | 756                                             | 753                 | 752                                 | 758                            | 1177                                            |
|                             | 741                               | 743                  | 742              | 675                               | 663                 | 671                                 | 609                            | 647                                             | 685                 | 676                                 | 577                            | 760                                             |

|                          |      |         |     |         |      |         |      |         |      |         |     |     |
|--------------------------|------|---------|-----|---------|------|---------|------|---------|------|---------|-----|-----|
|                          | 668  | 670     | 670 | 632     |      | 592     | 435  | 561     | 636  | 630     | 520 | 626 |
|                          | 634  | 633     | 613 | 560     |      |         |      | 516     |      |         | 516 | 579 |
|                          | 551  | 554     |     |         |      |         |      | 433     |      |         |     | 535 |
|                          |      | 546     |     |         |      |         |      |         |      |         |     |     |
| δ (S)OH                  |      |         |     |         | 1273 | 1249    |      |         | 1317 | 1144    |     |     |
|                          |      |         |     |         | 691  | 1221    |      |         | 1175 | 1132    |     |     |
|                          |      |         |     |         |      | 639     |      |         | 1152 | 1083    |     |     |
|                          |      |         |     |         |      | 578     |      |         | 1091 |         |     |     |
| ν (SO)                   |      |         |     |         | 1063 | 1050    | 1047 | 1074    | 756  | 759     | 953 | 939 |
|                          |      |         |     |         |      |         | 915  | 792     |      |         |     |     |
| ν SO(H)                  |      |         |     |         | 733  | 730     |      |         |      |         |     |     |
| ν (CS)                   |      |         |     |         |      |         |      |         |      |         | 684 | 692 |
| δ (SH)                   | 1040 | 1038    |     |         |      |         |      |         |      |         |     |     |
|                          | 851  | 852     |     |         |      |         |      |         |      |         |     |     |
|                          | 779  | 777     |     |         |      |         |      |         |      |         |     |     |
|                          | 371  | 370     |     |         |      |         |      |         |      |         |     |     |
|                          | 334  | 337     |     |         |      |         |      |         |      |         |     |     |
|                          |      | 315     |     |         |      |         |      |         |      |         |     |     |
|                          |      | 274     |     |         |      |         |      |         |      |         |     |     |
| δ (NH <sub>2</sub> )     | 305  |         | 373 | 270     | 356  | 355     | 421  | 321     | 360  | 360     | 350 | 361 |
|                          |      |         |     |         |      |         |      | 296     | 319  | 328     |     |     |
|                          |      |         |     |         |      | 322     |      | 278     |      |         |     |     |
| backbone                 | 265  | 418     | 325 | 522     | 534  | 533     | 560  | 572     | 580  | 576     | 474 | 517 |
|                          |      |         | 277 | 443     | 455  | 456     | 518  | 377     | 522  | 523     | 409 | 476 |
|                          |      |         |     | 346     | 415  | 415     | 514  | 262     | 506  | 504     | 357 | 369 |
|                          |      |         |     | 305     | 324  | 390     | 462  |         | 451  | 453     | 299 | 302 |
|                          |      |         |     | 258     | 292  |         | 318  |         | 416  | 425     | 269 |     |
|                          |      |         |     |         |      |         | 261  |         | 397  | 418     |     |     |
|                          |      |         |     |         |      |         |      |         | 293  | 268     |     |     |
| δ (SO <sub>3</sub> )     |      |         |     |         |      |         |      |         |      |         | 468 | 474 |
| δ OH (HSO <sub>3</sub> ) |      |         |     |         |      |         |      |         | 282  | 341     |     |     |
| Se <sub>8</sub>          |      | 262-257 |     | 281-251 |      | 264-258 |      | 266-251 |      | 265-253 |     |     |

Where ν and δ indicate stretching and bending vibrations.

**Table S2.** Density Functional Theory (DFT) calculations for IR vibrations performed considering cystine (RSSR) and its derivatives and their adsorption on Se<sub>8</sub> nuclei.

| Vibrational modes           | $\tilde{\nu}$ (cm <sup>-1</sup> ) |                         |           |                        |                         |                                      |
|-----------------------------|-----------------------------------|-------------------------|-----------|------------------------|-------------------------|--------------------------------------|
|                             | R-S-S-R                           | R-S-S-R/Se <sub>8</sub> | R-SO-S-RR | SO-S-R/Se <sub>8</sub> | R-SO <sub>2</sub> -S-RR | SO <sub>2</sub> -S-R/Se <sub>8</sub> |
| $\nu$ (NH <sub>2</sub> )    | 3540                              | 3540                    | 3566      | 3570                   | 3573                    | 3573                                 |
|                             | 3538                              | 3536                    | 3518      | 3523                   | 3533                    | 3535                                 |
|                             | 3460                              | 3459                    | 3481      | 3482                   | 3486                    | 3485                                 |
|                             | 3454                              | 3454                    | 3444      | 3444                   | 3450                    | 3451                                 |
| $\nu$ (CH <sub>2</sub> )    | 3124                              | 3132                    | 3141      | 3147                   | 3166                    | 3166                                 |
|                             | 3103                              | 3109                    | 3111      | 3144                   | 3162                    | 3161                                 |
|                             | 3061                              | 3065                    | 3059      | 3073                   | 3084                    | 3088                                 |
|                             | 3034                              | 3038                    | 3022      | 3068                   | 3068                    | 3067                                 |
| $\nu$ (CH)                  | 3088                              | 3084                    | 3069      | 3071                   | 3091                    | 3074                                 |
|                             | 2965                              | 2968                    | 2914      | 2983                   | 2987                    | 2980                                 |
| $\nu$ (CO)                  | 1845                              | 1842                    | 1835      | 1814                   | 1837                    | 1838                                 |
|                             | 1831                              | 1816                    | 1834      | 1781                   | 1812                    | 1812                                 |
| $\delta$ (NH <sub>2</sub> ) | 1642                              | 1642                    | 1655      | 1647                   | 1645                    | 1647                                 |
|                             | 1627                              | 1627                    | 1617      | 1610                   | 1614                    | 1614                                 |
|                             | 951                               | 953                     | 903       | 1257                   | 1267                    | 1408                                 |
|                             | 883                               | 880                     | 863       | 951                    | 1020                    | 1266                                 |
|                             |                                   |                         |           | 926                    | 921                     | 1173                                 |
|                             |                                   |                         |           | 897                    | 884                     | 1020                                 |
|                             |                                   |                         |           | 862                    | 855                     | 921                                  |
|                             |                                   |                         |           |                        |                         | 883                                  |
|                             |                                   |                         |           |                        |                         | 852                                  |
|                             |                                   |                         |           |                        |                         |                                      |
| $\delta$ (CH <sub>2</sub> ) | 1420                              | 1416                    | 1433      | 1432                   | 1432                    | 1432                                 |
|                             | 1414                              | 1405                    | 1408      | 1422                   | 1421                    | 1422                                 |
|                             | 1244                              | 1253                    | 1265      | 140                    | 1406                    | 1259                                 |
|                             | 1110                              | 1242                    | 1198      | 1400                   | 1256                    | 1208                                 |
|                             | 1099                              | 1225                    | 1191      | 1140                   | 1136                    | 1194                                 |
|                             | 787                               | 1192                    | 1145      | 1133                   | 1130                    | 1110                                 |
|                             | 768                               | 936                     | 1007      | 1005                   | 1106                    | 1007                                 |
|                             |                                   | 895                     | 837       | 813                    | 1007                    | 961                                  |
|                             |                                   | 629                     | 761       | 638                    | 958                     | 828                                  |
|                             |                                   | 622                     |           |                        | 826                     | 822                                  |
| $\delta$ (CH)               |                                   | 582                     |           |                        | 819                     |                                      |
|                             | 1436                              | 1459                    | 1425      | 1371                   | 1420                    | 1405                                 |
|                             | 1370                              | 1441                    | 1359      | 1322                   | 1370                    | 1401                                 |
|                             | 1356                              | 1374                    | 1248      | 1276                   | 1285                    | 1375                                 |
|                             | 1325                              | 1362                    | 1136      | 1191                   | 1207                    | 1290                                 |
|                             | 1254                              | 1149                    | 1020      | 1189                   | 1195                    |                                      |
|                             | 1224                              | 1112                    | 953       | 1108                   |                         |                                      |
| $\delta$ (OH)               | 1148                              | 1097                    | 921       | 1017                   |                         |                                      |
|                             | 1321                              | 1328                    | 1398      | 1437                   | 1343                    | 1331                                 |
|                             | 1263                              | 1319                    | 1381      | 1352                   | 1312                    | 1314                                 |
|                             | 1190                              | 1262                    | 1335      | 1285                   | 1273                    | 1273                                 |
|                             | 1169                              | 1174                    | 1306      | 1210                   | 1185                    | 1175                                 |
|                             | 801                               | 1145                    | 1273      | 1204                   | 1176                    | 1141                                 |
|                             | 640                               | 802                     | 1178      | 830                    | 771                     | 1126                                 |

|                      |      |         |      |         |      |      |
|----------------------|------|---------|------|---------|------|------|
|                      | 626  | 788     | 1164 | 780     | 754  | 758  |
|                      | 622  | 770     | 1120 | 758     | 681  | 749  |
|                      | 576  | 756     | 803  | 720     | 644  | 679  |
|                      |      | 682     | 756  | 666     | 636  | 639  |
|                      |      | 496     | 690  | 591     | 615  | 635  |
|                      |      |         | 648  | 506     | 581  | 591  |
|                      |      |         | 636  | 480     | 569  | 575  |
|                      |      |         | 594  |         |      | 569  |
|                      |      |         | 569  |         |      | 511  |
|                      |      |         | 486  |         |      |      |
|                      |      |         | 483  |         |      |      |
| v (SO)               |      |         | 1049 | 1037    | 1068 | 1069 |
| v (CS)               | 710  | 715     | 704  | 712     | 725  | 720  |
|                      | 708  | 710     |      | 694     |      |      |
|                      | 397  |         |      |         |      |      |
|                      | 370  |         |      |         |      |      |
| backbone             | 1049 | 1046    |      |         | 509  | 481  |
|                      | 1034 | 1029    |      |         | 482  |      |
|                      | 936  |         |      |         |      |      |
|                      | 896  |         |      |         |      |      |
|                      | 755  |         |      |         |      |      |
|                      | 710  |         |      |         |      |      |
|                      | 503  |         |      |         |      |      |
|                      | 287  |         |      |         |      |      |
| v (SS)               | 485  | 487     |      |         |      |      |
|                      | 476  | 480     |      |         |      |      |
| δ (NH <sub>2</sub> ) | 356  | 404     | 342  | 418     | 352  | 354  |
|                      | 294  | 337     | 328  | 338     | 336  | 336  |
|                      | 274  | 317     | 316  | 325     | 313  | 319  |
|                      | 270  | 279     | 295  | 285     | 306  | 295  |
|                      | 259  | 269     | 282  | 270     | 293  | 278  |
|                      |      | 268     | 265  | 263     | 273  | 257  |
|                      |      |         |      | 256     | 251  | 254  |
| δ (CH <sub>2</sub> ) | 321  | 317     | 449  | 412     | 421  | 421  |
|                      |      | 288     | 421  | 352     | 382  | 384  |
|                      |      |         | 391  | 303     |      |      |
| δ (SO)               |      |         | 251  | 450     |      |      |
| δ (SO <sub>2</sub> ) |      |         |      |         | 467  | 470  |
| Ses                  |      | 259-258 |      | 263-254 |      | 263  |

Where v and δ indicate stretching and bending vibrations.

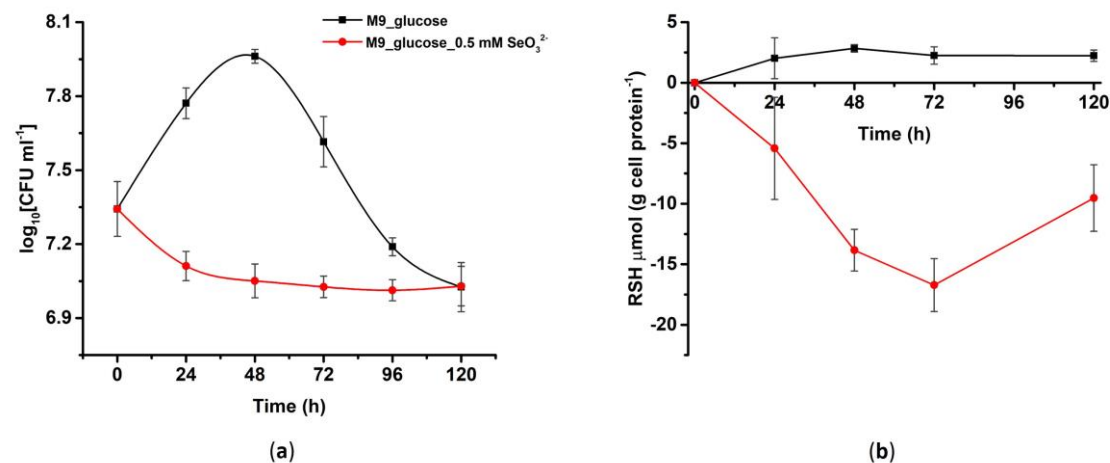

**Figure S2:** (a) Growth profile and (b) RSH depletion of *Micrococcus* sp. cells in M9 medium supplied with either glucose or glucose and  $\text{SeO}_3^{2-}$

**Table S3.** ATR-FTIR absorption bands and identification of *Micrococcus* sp. unchallenged cells or exposed to  $\text{SeO}_3^{2-}$ .

| $\tilde{\nu} (\text{cm}^{-1})$ |        |         |                                    |                                    |                                     | Vibrational modes        | Identification                           |
|--------------------------------|--------|---------|------------------------------------|------------------------------------|-------------------------------------|--------------------------|------------------------------------------|
| M9_24h                         | M9_72h | M9_120h | M9_0.5 mM $\text{SeO}_3^{2-}$ _24h | M9_0.5 mM $\text{SeO}_3^{2-}$ _72h | M9_0.5 mM $\text{SeO}_3^{2-}$ _120h |                          |                                          |
| 3286                           | 3284   | 3286    | 3285                               | 3282                               | 3284                                | $\nu (\text{NH})$        | Proteins (Amide A) [1]                   |
| 3070                           | 3068   | 3068    | 3069                               | 3062                               | 3067                                | $\nu_s (\text{NH}_3^+)$  | Proteins (Amide B) [2]                   |
| 2955                           | 2953   | 2962    | 2960                               | 2958                               | 2962                                | $\nu_{as} (\text{CH}_3)$ | Fatty acids [1-3]                        |
| 2923                           | 2921   | 2924    | 2925                               | 2926                               | 2928                                | $\nu_{as} (\text{CH}_2)$ | Fatty acids [1-3]                        |
| 2869                           | 2876   | 2872    | 2875                               | 2872                               | 2873                                | $\nu_s (\text{CH})$      | Amino acids in fatty acids [3]           |
| 2856                           | 2850   | 2852    | 2854                               | 2853                               | 2855                                | $\nu_s (\text{CH}_2)$    | Fatty acids [1-3]                        |
| 1742                           | 1739   | 1740    | 1736                               | 1740                               | 1739                                | $\nu (\text{CO})$        | Ester moieties of lipids and polysaccha- |

|         |         |         |         |         |         |                                                                                                                                                           |                                                                                                                                                                                                                                                         |
|---------|---------|---------|---------|---------|---------|-----------------------------------------------------------------------------------------------------------------------------------------------------------|---------------------------------------------------------------------------------------------------------------------------------------------------------------------------------------------------------------------------------------------------------|
|         |         |         |         |         |         |                                                                                                                                                           | rides [1-3]                                                                                                                                                                                                                                             |
| 1652    | 1650    | 1651(s) |         |         |         | $\nu$ (CO)                                                                                                                                                | $\alpha$ -helix proteins (Amide I) [1-3]                                                                                                                                                                                                                |
| 1642(s) | 1643(s) | 1643    | 1646    | 1644    | 1645    | $\nu_{as}$ (COO <sup>-</sup> ); $\beta$ (NH <sub>2</sub> );<br>$\delta$ (NH)                                                                              | $\beta$ -sheet proteins [1]                                                                                                                                                                                                                             |
|         |         |         | 1559(s) | 1561(s) | 1558(s) | $\delta$ (NH); $\nu$ (CN)                                                                                                                                 | $\alpha$ -helix proteins (Amide II) [1-3]                                                                                                                                                                                                               |
| 1545    | 1544    | 1539    | 1541    | 1542    | 1539    | $\delta$ (NH); $\nu$ (CN)                                                                                                                                 | $\alpha$ -helix proteins (Amide II) [1-3]                                                                                                                                                                                                               |
|         |         |         | 1515(s) | 1514(s) | 1515(s) | $\delta_s$ (NH <sub>3</sub> <sup>+</sup> ); $\delta$ (NH);<br>$\nu$ (CN)                                                                                  | Amino acid residues [2];<br>RSH-containing molecules                                                                                                                                                                                                    |
| 1467(s) | 1469(s) | 1468(s) | 1467(s) | 1468(s) | 1468(s) | $\delta$ (CH <sub>2</sub> ); $\delta$ (CH <sub>3</sub> );<br>$\beta$ (CH <sub>2</sub> )                                                                   | Lipids and proteins [3]                                                                                                                                                                                                                                 |
| 1450    | 1452    | 1450    | 1448    | 1450    | 1451    | $\delta_{sciss}$ (CH <sub>2</sub> ); $\delta$ (OH);<br>$\nu$ CC(O); $\nu_s$ (COO <sup>-</sup> )                                                           | Polysaccharides [4]; aliphatic groups of<br>proteins [5]; R-SO <sub>2</sub> H-containing mole-<br>cules adsorbed on SeNP                                                                                                                                |
| 1395    | 1394    | 1393    | 1395    | 1394    | 1395    | $\nu_s$ (COO <sup>-</sup> )                                                                                                                               | Amino acid side chains; free fatty acids<br>[3]; peptides [5]                                                                                                                                                                                           |
| 1385(s) | 1384(s) | 1385(s) |         |         |         | $\delta$ (CH); $\delta$ (COH);<br>$\beta$ (CH <sub>3</sub> ); $\nu$ CC(O);<br>$\nu_s$ (COO <sup>-</sup> ); $\delta$ (NH <sub>2</sub> );<br>$\nu$ (CN)     | Aldehydes; carboxylic acids; peptides<br>[5]; aromatic amines [6]                                                                                                                                                                                       |
|         |         |         | 1373(s) | 1377(s) | 1373(s) | $\beta$ (CH <sub>3</sub> ); $\delta$ (CH); $\delta$ (OH);                                                                                                 | Lipids and proteins [3]; RSH-, RSO <sub>3</sub> H-,<br>RSSR-, and RSO <sub>2</sub> SR-containing mole-<br>cules; RSH-, RS-, RSO <sub>2</sub> -, RSO <sub>3</sub> H-,<br>RSSR-, RSOSR-, and RSO <sub>2</sub> SR-containing<br>molecules adsorbed on SeNP |
| 1301    | 1299    | 1299    | 1298    | 1300    | 1300    | $\omega$ (CH <sub>2</sub> ); $\nu$ (CN);<br>$\delta$ (NH <sub>2</sub> ); $Q_{as(oph)}$ (CH);<br>$\nu$ (COC); $\nu$ (CCO);<br>$\delta$ (OH); $\delta$ (CH) | Ester moieties [1]; proteins [3]; RSH-,<br>RSO <sub>2</sub> -, RSO <sub>3</sub> H-, RSSR-,<br>RSOSR-containing molecules; RSH-and<br>RSO <sub>2</sub> H-, RSO <sub>3</sub> H-, RSO <sub>3</sub> -containing<br>molecules adsorbed on SeNP;              |
| 1249    | 1246    | 1243    | 1244    | 1243    | 1243    | $\nu$ (CN); $\delta$ (NH <sub>2</sub> )                                                                                                                   | Proteins (Amide III) [1]                                                                                                                                                                                                                                |
| 1149    | 1146    | 1147    | 1149    | 1150    | 1151    | $\nu_{as}$ (COC); $\delta$ (CH <sub>2</sub> );<br>$\delta$ (CH); $\delta$ (NH <sub>2</sub> );<br>$\delta$ (OH); $\delta$ (S)OH; $\nu$ (CO)                | Nucleic acids; $\alpha_{(1,4)}$ glycosidic bonds [7];<br>polysaccharide ring [8]; amino acids [9];<br>RSH-containing molecules                                                                                                                          |



|         |         |         |         |         |         |                                                                                                                                                                                   |                                                                                                                                                                                                                                                             |
|---------|---------|---------|---------|---------|---------|-----------------------------------------------------------------------------------------------------------------------------------------------------------------------------------|-------------------------------------------------------------------------------------------------------------------------------------------------------------------------------------------------------------------------------------------------------------|
| 1102(s) | 1099(s) | 1101(s) | 1099(s) | 1102(s) | 1101(s) | $\nu_{as}$ (COC); $\nu$ (CC);<br>$\nu$ (CO); $\delta$ (COH);<br>$\nu$ P(OH) <sub>2</sub>                                                                                          | $\beta_{(1,4)}$ glycosidic bonds [7]; amino acids [9]; polysaccharides [4,8]                                                                                                                                                                                |
| 1075    | 1076    | 1070(s) | 1073    | 1074(s) | 1071(s) | $\nu$ (CO); $\nu$ (CC);<br>$\nu$ (COH); $\delta$ (COC);<br>$\rho$ (NH <sub>3</sub> <sup>+</sup> ); $\nu$ (SO)                                                                     | Polysaccharides, proteins, and polyesters [10]; amino acid residues [11]; RSO <sub>2</sub> <sup>-</sup> -containing molecules adsorbed on SeNP                                                                                                              |
| 1062    | 1063    |         |         |         |         | $\nu$ (CO); $\rho$ (CO);<br>$\nu_s$ (PO <sub>2</sub> <sup>-</sup> ); $\nu$ (CC);<br>$\nu$ (C)OH; $\nu$ (COH);<br>$\delta$ (COC)                                                   | Nucleic acids [4]; phospholipids [4]; $\beta_{(1,3)}$ glycosidic bonds [7]; polysaccharides [1]                                                                                                                                                             |
| 1049(s) | 1050(s) |         | 1055    | 1054    | 1055    | $\nu$ (CC); $\nu$ (CO);<br>$\delta$ (COH); $\nu$ (SO)                                                                                                                             | Polysaccharides [9]; RSO <sub>2</sub> H-containing molecules adsorbed on SeNP                                                                                                                                                                               |
| 1037    | 1037    | 1035    | 1038    | 1036    | 1038    | $\nu$ (PO); $\nu$ (SH); $\nu$ (SO);<br>backbone vibration                                                                                                                         | Polysaccharides and nucleic acids [1-4]; RSSR-containing molecules; RSH- and RSOSR-containing molecules adsorbed on SeNP                                                                                                                                    |
| 990     | 988     | 985(s)  | 990     | 982(s)  | 982(s)  | $\delta$ (NH <sub>2</sub> ); $\delta$ (HNCC);<br>$\nu$ (CO); $\nu_s$ (PO <sub>3</sub> <sup>2-</sup> );<br>$\delta$ (COH); $\nu$ (CC)                                              | Amino acids [9,12]; $\beta_{(1,3)}$ glycosidic bonds [7]; nucleic acids [11]; polysaccharides [8]; RS-containing molecules adsorbed on SeNP                                                                                                                 |
| 922     | 921     | 922     | 920     | 921     | 922     | $\delta$ (=CH); $\tau$ (CH <sub>2</sub> );<br>$\nu_s$ (PO <sub>4</sub> <sup>3-</sup> ); $\delta$ (SH);<br>$\nu$ (SO); $\delta$ (NH <sub>2</sub> );<br>$\delta$ (CH <sub>2</sub> ) | Alkyl halides, carboxylic acids; amines; $\alpha_{(1,3)}$ glycosidic bonds [7]; amino acid residues [9]; nucleic acids [4]; RSH-, RSSR-, RSO <sub>2</sub> SR-containing molecules; RSSR-, RSOSR-, RSO <sub>2</sub> SR-containing molecules adsorbed on SeNP |
| 860     | 857     | 860     | 863     | 862     | 863     | $\delta$ (NH <sub>2</sub> ); $\nu$ (CC);<br>$\nu$ (CN)                                                                                                                            | Amino acid residues [9]; RSO <sub>2</sub> H-containing molecules adsorbed on SeNP                                                                                                                                                                           |
| 802     | 803     | 802     | 802     | 800(s)  | 796(s)  | $\nu$ SO(H); $\delta$ (OH)<br>$\delta_{op}$ (HOCC); $\nu$ (PO)                                                                                                                    | Amino acids [9]; nucleic acids [13]; RSH-, RS-, RSSR-containing molecules; RS-, RSOSR-containing molecules ad-                                                                                                                                              |

|        |        |        |     |            |            |                                                                                                                               |                                                                                                                                                                                                        |
|--------|--------|--------|-----|------------|------------|-------------------------------------------------------------------------------------------------------------------------------|--------------------------------------------------------------------------------------------------------------------------------------------------------------------------------------------------------|
|        |        |        |     |            |            |                                                                                                                               | sorbed on SeNP                                                                                                                                                                                         |
| 779    | 779    | 779    | 778 | 777        | 777        | $\nu$ C(COOH);<br>$\delta$ (NH <sub>2</sub> ); $\rho$ (CH <sub>2</sub> );<br>$\delta$ (HNC);<br>$\delta$ (CCH); $\delta$ (OH) | Amino acids [9]; RSH-, RSSR-, RSO <sub>2</sub> SR-,<br>RSO <sub>2</sub> SR-containing molecules;<br>RSO <sub>3</sub> <sup>-</sup> -containing molecules adsorbed<br>on SeNP                            |
|        |        |        | 739 | 754<br>738 | 755<br>738 | $\delta$ (NH <sub>2</sub> )C(COOH);<br>$\rho$ (CH <sub>2</sub> ); $\delta$ (OH)                                               | Amino acids [9]; RSH-, RS-, RSO <sub>2</sub> H-,<br>RSO <sub>2</sub> <sup>-</sup> -, RSO <sub>2</sub> SR-containing molecules<br>adsorbed on SeNP                                                      |
| 722    | 724    | 723    | 722 | 721        | 722        | $\beta_{op}$ <i>cis</i> (CH); $\nu$ (CN);<br>$\rho$ (CH <sub>2</sub> ); $\nu$ (CS)                                            | Amino acids [9]; fatty acid chains [3];<br>RSSR-, RSO <sub>2</sub> SR-, RSO <sub>2</sub> SR-containing<br>molecules adsorbed on SeNP                                                                   |
| 700    | 700    | 701    | 701 | 699        | 700        | $\omega$ (CO); $\delta$ (=CH);<br>$\nu$ (CS)                                                                                  | Alkyl halides, carboxylic acids, and<br>amines [2-4]                                                                                                                                                   |
|        |        |        | 670 | 671        | 673        | $\delta$ (OH); $\delta$ (CCC);<br>$\delta$ (COO)                                                                              | Amino acid residues [9];<br>RSO <sub>2</sub> <sup>-</sup> -containing molecules adsorbed on<br>SeNP                                                                                                    |
| 631(s) | 630(s) | 629(s) |     |            |            | $\nu$ (CS); $\delta$ (OH);<br>$\delta$ (S)OH                                                                                  | RSH-containing molecules; RSH-, RS-,<br>RSO <sub>3</sub> <sup>-</sup> -, RSSR-containing molecules ad-<br>sorbed on SeNP                                                                               |
|        |        |        | 534 | 532        | 533        | $\delta$ (OH); $\rho$ (COO-);<br>backbone vibrations                                                                          | RSH-, RSO <sub>2</sub> H-, RSSR-containing mole-<br>cules; RSO <sub>2</sub> H-, RSO <sub>3</sub> <sup>-</sup> -containing mole-<br>cules adsorbed on SeNP                                              |
| 527    | 527    | 528    | 527 | 528        | 525        | $\delta$ (OH); $\delta$ (COO-);<br>backbone vibrations                                                                        | Amino acid residues [9]; RSO <sub>3</sub> H-,<br>RSO <sub>3</sub> <sup>-</sup> -containing molecules; RS-,<br>RSO <sub>3</sub> H-containing molecules adsorbed<br>on SeNP                              |
| 520    | 521    | 520    | 519 | 518        | 519        | $\delta_{op}$ (OH); $\delta$ (COO-);<br>$\omega$ (OH)                                                                         | Amino acid residues [9]; polysaccha-<br>rides [14]; RSO <sub>3</sub> H-containing molecules<br>adsorbed on SeNP                                                                                        |
|        | 469    | 470    | 470 | 471(s)     | 471(s)     | $\delta$ (OH); $\tau$ (NH <sub>2</sub> )                                                                                      | Amino acid residues [9]; RSO <sub>2</sub> <sup>-</sup> -, RSO <sub>3</sub> <sup>-</sup> -<br>RSO <sub>2</sub> SR-containing molecules;<br>RSO <sub>2</sub> SR-containing molecules adsorbed<br>on SeNP |

|        |        |        |     |     |     |                                            |                                                                                                                                                                              |
|--------|--------|--------|-----|-----|-----|--------------------------------------------|------------------------------------------------------------------------------------------------------------------------------------------------------------------------------|
| 409(s) | 408(s) | 410(s) | 412 | 415 | 411 | $\delta$ (OH); $\delta$ (SO <sub>3</sub> ) | Amino acid residues [9];<br>RSO <sub>2</sub> H-containing molecules; RSO <sub>2</sub> H-,<br>RSO <sub>3</sub> <sup>-</sup> , RSSR-containing molecules ad-<br>sorbed on SeNP |
|--------|--------|--------|-----|-----|-----|--------------------------------------------|------------------------------------------------------------------------------------------------------------------------------------------------------------------------------|

Where  $\nu$ ,  $\delta$ ,  $\beta$ ,  $\rho$ ,  $\tau$ , and  $\omega$  indicate stretching, bending, deformation, rocking, twisting, and wagging, respectively; sciss, oph, as, s, and ip stand for scissoring, out of phase, asymmetric, symmetric, and in plane vibrations.

**Table S4.** ATR-FTIR absorption bands and identification of biogenic samples (Bio SeNP extract, OM, and Bio SeNP extract\_w).

| $\tilde{\nu}$ (cm <sup>-1</sup> ) |      |                    | Vibrational modes                          |  | Identification                                                                                            |
|-----------------------------------|------|--------------------|--------------------------------------------|--|-----------------------------------------------------------------------------------------------------------|
| Bio SeNP extract                  | OM   | Bio SeNP extract_w |                                            |  |                                                                                                           |
|                                   |      | 3438(s)            | $\nu$ (OH)                                 |  | H-bonded water impurities [15]                                                                            |
|                                   |      | 3387(s)            | $\nu$ (OH); $\nu_{as}$ (NH)                |  | Proteins [16]                                                                                             |
|                                   |      | 3349(s)            | $\nu$ (OH); $\nu_s$ (NH)                   |  | Proteins [16]                                                                                             |
|                                   |      | 3303               | $\nu$ (OH); $\nu$ (NH)                     |  | Water; proteins (Amide A) [10]                                                                            |
| 3289                              | 3285 |                    | $\nu$ (NH)                                 |  | Proteins (Amide A) [1]                                                                                    |
| 3200(s)                           |      | 3220(s)            | $\nu$ (CH); $\nu$ (NH)                     |  | Free amino acid residues [17]                                                                             |
|                                   |      | 3145(s)            | $\nu$ (CH); $\nu_{as}$ (NH <sup>3+</sup> ) |  | Proteins or amino acid residues [11];<br>RS <sup>-</sup> -containing molecules adsorbed on SeNP           |
|                                   |      | 3092               | $\nu_s$ (NH <sup>3+</sup> ); $\nu$ (CH)    |  | Microbial proteins (Amide A) [10]; S <sup>-</sup> and SO <sub>2</sub> <sup>-</sup><br>adsorbed on SeNP    |
| 3070                              | 3073 | 3065               | $\nu_s$ (NH <sup>3+</sup> )                |  | Proteins (Amide B) [2]                                                                                    |
|                                   |      | 3030               | $\nu$ (CH); $\nu_s$ (NH <sup>3+</sup> )    |  | Amino acid residues [9]; RSH- and<br>RSO <sub>2</sub> <sup>-</sup> -containing molecules adsorbed on SeNP |
| 2950                              | 2960 | 2956               | $\nu_{as}$ (CH <sub>3</sub> )              |  | Fatty acids [1-3]                                                                                         |
| 2923                              | 2923 | 2925               | $\nu_{as}$ (CH <sub>2</sub> )              |  | Fatty acids [1-3]                                                                                         |
| 2877                              | 2873 | 2872               | $\nu_s$ (CH)                               |  | Amino acids in fatty acids [3]                                                                            |
| 2857                              | 2851 | 2856               | $\nu_s$ (CH <sub>2</sub> )                 |  | Fatty acids [1-3]                                                                                         |
|                                   |      | 2476               | $\nu$ (-NH <sup>+</sup> )                  |  | Free amino acids [17]                                                                                     |
|                                   |      | 2410               | $\nu$ (-NH <sup>+</sup> )                  |  | Free amino acids [17]                                                                                     |
| 1740                              | 1739 | 1737               | $\nu$ (CO)                                 |  | Ester moieties of lipids and polysaccharides<br>[1-3]                                                     |
| 1649                              | 1651 | 1652               | $\nu$ (CO); $\nu$ <i>cis</i> (HC=CH)       |  | $\alpha$ -helix proteins [1-3]                                                                            |

|         |         |         |                                                                                                                                                                                                |                                                                                                                                                                                                                                                                         |
|---------|---------|---------|------------------------------------------------------------------------------------------------------------------------------------------------------------------------------------------------|-------------------------------------------------------------------------------------------------------------------------------------------------------------------------------------------------------------------------------------------------------------------------|
| 1634(s) | 1629(s) | 1634(s) | $\nu_{as}(\text{COO}^-)$ ; $\beta(\text{NH}_2)$ ; $\delta(\text{NH})$                                                                                                                          | $\beta$ -sheet proteins [1,10]                                                                                                                                                                                                                                          |
| 1538    | 1538    | 1548(s) | $\delta(\text{NH})$ ; $\nu(\text{CN})$                                                                                                                                                         | $\alpha$ -helix proteins (Amide II) [1-3]                                                                                                                                                                                                                               |
| 1517(s) | 1511(s) |         | $\delta_s(\text{NH}_3^+)$                                                                                                                                                                      | Proteins [2]; RSH-containing molecules                                                                                                                                                                                                                                  |
| 1458    | 1457    |         | $\beta_{\text{scissoring}}(\text{CH}_2)$ ; $\nu_{as(\text{oph})}(\text{CH})$ ;<br>$\delta_{as}(\text{CH}_3)$ ; $\delta(\text{OH})$ ; $\nu \text{CC}(\text{O})$                                 | Lipids, proteins and polyesters ([1,3]                                                                                                                                                                                                                                  |
|         |         | 1440    | $\delta_{\text{sciss}}(\text{CH}_2)$ ; $\delta(\text{OH})$ ;<br>$\nu \text{CC}(\text{O})$ ; $\nu_s(\text{COO}^-)$                                                                              | Polysaccharides [4]; aliphatic groups of proteins [5]; $\text{RSO}_2\text{H}$ -containing molecules adsorbed on SeNP                                                                                                                                                    |
| 1385    | 1384    | 1385(s) | $\delta(\text{CH})$ ; $\delta(\text{COH})$ ; $\beta(\text{CH}_3)$ ;<br>$\nu \text{CC}(\text{O})$ ; $\nu_s(\text{COO}^-)$ ; $\delta(\text{NH}_2)$ ;<br>$\nu(\text{CN})$                         | Aldehydes; carboxylic acids; peptides [5]; aromatic amines [6]                                                                                                                                                                                                          |
|         |         | 1329    | $\delta(\text{CH})$ ; $\nu(\text{CH}_2)$ ; $\delta(\text{OH})$ ; $\beta \text{C}(\text{OH})$                                                                                                   | Polysaccharides [3-4]; RSH-containing molecules; RS-containing molecules adsorbed on SeNP                                                                                                                                                                               |
| 1303    | 1301    | 1304    | $\omega(\text{CH}_2)$ ; $\nu(\text{CN})$ ; $\delta(\text{NH}_2)$ ; $\delta(\text{OH})$ ;<br>$\delta(\text{CH})$ ; $\nu_{as(\text{oph})}(\text{CH})$ ; $\nu(\text{COC})$ ;<br>$\nu(\text{CCO})$ | Ester moieties [1]; proteins (Amide III) [1-3];<br>RSH-, $\text{RSO}_2^-$ -, $\text{RSO}_3\text{H}$ -, RSSR-,<br>RSOSR-containing molecules; RSH-and<br>$\text{RSO}_2\text{H}$ -, $\text{RSO}_3\text{H}$ -, $\text{RSO}_3^-$ -containing molecules<br>adsorbed on SeNP; |
| 1256    | 1253(s) | 1246    | $\nu(\text{CN})$ ; $\delta(\text{NH}_2)$                                                                                                                                                       | Proteins (Amide III) [1-3]                                                                                                                                                                                                                                              |
| 1229    | 1231    |         | $\nu \text{CO}(\text{H})$ ; $\delta(\text{COH})$ ; $\nu(\text{CO})$ ;<br>$\nu_{as}(\text{PO}_2^-)$ ; $\nu(\text{CN})$                                                                          | Nucleic acids [15]; amino acids [12]                                                                                                                                                                                                                                    |
| 1173(s) | 1169    |         | $\nu(\text{CN})$ ; $\nu(\text{NH})$ ; $\nu_{as(\text{oph})}(\text{CH})$ ;<br>$\nu(\text{CO})$ ; $\delta(\text{CH})$ ; $\delta(\text{S})\text{OH}$ ;<br>$\nu(\text{CC})$ ; $\delta(\text{OH})$  | Triglyceride ester linkage; $\beta_{(1,3)}$ glycosidic bonds [7]; amino acids [9]; RS-, RSSR-containing molecules; RSH-containing molecules adsorbed on SeNP                                                                                                            |
| 1151(s) | 1149    | 1158(s) | $\nu_{as}(\text{COC})$ ; $\delta(\text{CH}_2)$ ; $\delta(\text{CH})$ ;<br>$\delta(\text{NH}_2)$ ; $\delta(\text{OH})$ ; $\delta(\text{S})\text{OH}$ ; $\nu(\text{CO})$                         | Nucleic acids; $\alpha_{(1,4)}$ glycosidic bonds [7]; polysaccharide ring [8]; amino acids [9];<br>RSH-containing molecules                                                                                                                                             |
| 1098    | 1100    |         | $\nu_{as}(\text{COC})$ ; $\nu(\text{CC})$ ; $\nu(\text{CO})$ ;<br>$\delta(\text{COH})$ ; $\nu \text{P}(\text{OH})_2$                                                                           | $\beta_{(1,4)}$ glycosidic bonds [7]; amino acids [9]; polysaccharides [4,8]                                                                                                                                                                                            |
|         |         | 1070    | $\nu(\text{CO})$ ; $\nu(\text{CC})$ ; $\nu(\text{COH})$ ; $\delta(\text{COC})$ ;                                                                                                               | Polysaccharides, proteins, and polyesters [10]; amino acid residues [11]; $\text{RSO}_2^-$ -containing                                                                                                                                                                  |

|        |      |         |                                                                                                                                                                |                                                                                                                                                                                                                                                                                                              |
|--------|------|---------|----------------------------------------------------------------------------------------------------------------------------------------------------------------|--------------------------------------------------------------------------------------------------------------------------------------------------------------------------------------------------------------------------------------------------------------------------------------------------------------|
| 1057   | 1059 | 1052(s) | $\rho$ ( $\text{NH}_3^+$ ); $\nu$ (SO)<br>$\nu$ (CO); $\rho$ (CO); $\nu_s$ ( $\text{PO}_2^-$ ); $\nu$ (CC);<br>$\nu$ (C)OH; $\nu$ (COH); $\delta$ (COC)        | molecules adsorbed on SeNP<br>Nucleic acids, phospholipids, and polysaccharides [1-4]                                                                                                                                                                                                                        |
| 981    | 980  |         | $\delta$ ( $\text{NH}_2$ ); $\delta$ (HNCC); $\nu$ (CO);<br>$\nu_s$ ( $\text{PO}_3^{2-}$ ); $\nu$ (CO); $\nu$ (CC)                                             | Amino acids [9,12]; $\beta_{(1,3)}$ glycosidic bonds [7];<br>nucleic acids [10]; RS-containing molecules<br>adsorbed on SeNP                                                                                                                                                                                 |
|        |      | 969(s)  | $\delta$ ( $\text{NH}_2$ ); $\delta$ (HNCC)                                                                                                                    | Amino acid residues [9]; RSH-containing molecules<br>adsorbed on SeNP                                                                                                                                                                                                                                        |
| 932    | 926  | 931     | $\delta$ (=CH); $\tau$ ( $\text{CH}_2$ ); $\nu_s$ ( $\text{PO}_4^{3-}$ ); $\delta$ (SH);<br>$\nu$ (SO); $\delta$ ( $\text{NH}_2$ ); $\delta$ ( $\text{CH}_2$ ) | Alkyl halides, carboxylic acids; amines; $\alpha_{(1,3)}$<br>glycosidic bonds [7]; amino acid residues [9];<br>nucleic acids [4]; RSH-, RSSR-,<br>RSO <sub>2</sub> SR-containing molecules; RSSR-, RSOSR-,<br>RSO <sub>2</sub> SR-containing molecules adsorbed on<br>SeNP                                   |
| 899    | 894  | 897     | $\delta$ ( $\text{NH}_2$ ); $\nu$ (COC); $\nu$ (CC);<br>$\nu$ (CN);<br>$\delta$ ( $\text{CH}_2$ )                                                              | $\beta_{(1,4)}$ glycosidic bonds [7]; amino acid residues<br>[9]; RSO <sub>3</sub> H-, RSO <sub>3</sub> <sup>-</sup> -containing molecules; RS-,<br>RSO <sub>3</sub> <sup>-</sup> -, RSSR-, RSOSR-containing molecules<br>adsorbed on SeNP                                                                   |
|        |      | 857(s)  | $\delta$ ( $\text{NH}_2$ ); $\nu$ (CC); $\nu$ (CN)                                                                                                             | Amino acid residues [9]; RSO <sub>2</sub> H-containing<br>molecules adsorbed on SeNP                                                                                                                                                                                                                         |
| 824(s) |      |         | $\delta$ ( $\text{NH}_2$ ); $\omega$ (COO <sup>-</sup> );<br>$\delta$ ( $\text{CH}_2$ ); $\delta$ (OH)                                                         | RSH-, RSO <sub>3</sub> H-, RSO <sub>3</sub> <sup>-</sup> -, RSSR-,<br>RSO <sub>2</sub> SR-containing molecules; RSH-, RSO <sub>2</sub> H-,<br>RSO <sub>2</sub> <sup>-</sup> -, RSO <sub>3</sub> H-, RSO <sub>3</sub> <sup>-</sup> -, RSOSR-,<br>RSO <sub>2</sub> SR-containing molecules adsorbed on<br>SeNP |
| 806    | 811  |         | $\nu$ SO(H); $\delta$ (OH) $\delta_{\text{op}}$ (HOCC);<br>$\nu$ (PO)                                                                                          | Amino acids [9]; nucleic acids [13]; RSH-, RS-,<br>RSSR-containing molecules; RS-,<br>RSOSR-containing molecules adsorbed on SeNP                                                                                                                                                                            |
|        |      | 790     | $\nu$ SO(H); $\rho$ ( $\text{CH}_2$ )                                                                                                                          | RSH-containing molecules; RSO <sub>2</sub> H-containing<br>molecules adsorbed on SeNP                                                                                                                                                                                                                        |
| 769    |      | 768     | $\nu$ C(COOH); $\delta$ ( $\text{NH}_2$ ); $\rho$ ( $\text{CH}_2$ );<br>$\delta$ (HNC); $\delta$ (CCH); $\delta$ (OH)                                          | Amino acids [9]; RSH-, RSSR-, RSOSR-,<br>RSO <sub>2</sub> SR-containing molecules; RSO <sub>3</sub> <sup>-</sup> -containing<br>molecules adsorbed on SeNP                                                                                                                                                   |
| 740    | 738  |         | $\delta$ ( $\text{NH}_2$ )C(COOH);                                                                                                                             | Amino acids [9]; RSH-, RS-, RSO <sub>2</sub> H-, RSO <sub>2</sub> <sup>-</sup> -,                                                                                                                                                                                                                            |

|        |     |        | $\rho$ (CH <sub>2</sub> ); $\delta$ (OH)                                         | RSO <sub>2</sub> SR-containing molecules adsorbed on SeNP                                                                                                        |
|--------|-----|--------|----------------------------------------------------------------------------------|------------------------------------------------------------------------------------------------------------------------------------------------------------------|
| 714(s) | 717 | 718(s) | $\beta_{op}$ <i>cis</i> (CH); $\nu$ (CN); $\rho$ (CH <sub>2</sub> ); $\nu$ (CS)  | Amino acids [9]; fatty acid chains [3]; RSSR-, RSOSR-, RSO <sub>2</sub> SR-containing molecules adsorbed on SeNP                                                 |
| 700    | 700 | 697    | $\omega$ (CO); $\delta$ (=CH); $\nu$ (CS)                                        | Alkyl halides, carboxylic acids and amines [1-4]                                                                                                                 |
|        |     | 672    | $\delta$ (OH); $\delta$ (CCC); $\delta$ (COO)                                    | Amino acid residues [9]; RSO <sub>2</sub> <sup>-</sup> -containing molecules adsorbed on SeNP                                                                    |
| 659    | 660 | 652(s) | $\delta$ (OH); $\delta_{op}$ (HOCC)                                              | Amino acid residues [9]; RSO <sub>2</sub> H-, RSOSR-containing molecules adsorbed on SeNP                                                                        |
|        |     | 641    | $\delta$ (OH); $\delta_{op}$ (HOCC)                                              | Amino acid residues [9]; RS-, RSO <sub>2</sub> <sup>-</sup> , and RSO <sub>3</sub> H-containing molecules adsorbed on SeNP                                       |
| 625    |     | 626    | $\nu$ (CS); $\delta$ (OH); $\delta$ (S)OH                                        | RSH-containing molecules; RSH-, RS-, RSO <sub>3</sub> <sup>-</sup> , RSSR-containing molecules adsorbed on SeNP                                                  |
| 604    |     | 604    | $\delta$ (OH); $\delta_{op}$ (NH <sub>2</sub> )                                  | Amino acid residues [9]; RSO <sub>2</sub> <sup>-</sup> -containing molecules                                                                                     |
|        |     | 595    | $\delta$ (OH)                                                                    | RSO <sub>2</sub> <sup>-</sup> and RSO <sub>3</sub> H-containing molecules adsorbed on SeNP                                                                       |
|        |     | 588    | $\delta$ (NH <sub>2</sub> ); $\delta$ (COO <sup>-</sup> )                        | Amino acid residues [9]; RSO <sub>3</sub> <sup>-</sup> -containing molecules adsorbed on SeNP                                                                    |
|        |     | 577    | $\delta$ (COO <sup>-</sup> ); $\delta_{op}$ (OH)                                 | Amino acid residues [9]; RSO <sub>2</sub> <sup>-</sup> -containing molecules adsorbed on SeNP                                                                    |
| 566    |     |        | $\delta$ (OH); $\delta$ (NH <sub>2</sub> ); $\delta$ (OCOH); backbone vibrations | Amino acid residues [9]; RSOSR-containing molecules; RS-, RSO <sub>2</sub> <sup>-</sup> , RSO <sub>2</sub> SR-containing molecules adsorbed on SeNP              |
|        |     | 555    | $\delta$ (OH); $\delta$ (NH <sub>2</sub> ); $\delta$ (OCOH)                      | Amino acid residues [9]; RSH-containing molecules adsorbed on SeNP                                                                                               |
|        | 534 | 536    | $\delta$ (OH); $\rho$ (COO <sup>-</sup> ); backbone vibrations                   | RSH-, RSO <sub>2</sub> H-, RSSR-containing molecules; RSO <sub>2</sub> H-, RSO <sub>3</sub> <sup>-</sup> -containing molecules adsorbed on SeNP                  |
| 524    |     | 524(s) | $\delta$ (OH); $\delta$ (COO <sup>-</sup> ); backbone vibrations                 | Amino acid residues [9]; RSO <sub>3</sub> H-, RSO <sub>3</sub> <sup>-</sup> -containing molecules; RS-, RSO <sub>3</sub> H-containing molecules adsorbed on SeNP |
|        |     | 514    | $\delta_{op}$ (OH); $\omega$ (OH); $\delta$ (COO <sup>-</sup> )                  | Amino acid residues [9]; RSO <sub>3</sub> H-containing                                                                                                           |

|     |     |        |                                                                                                                                             |                                                                                                                                                                                                         |
|-----|-----|--------|---------------------------------------------------------------------------------------------------------------------------------------------|---------------------------------------------------------------------------------------------------------------------------------------------------------------------------------------------------------|
|     |     |        |                                                                                                                                             | molecules adsorbed on SeNP                                                                                                                                                                              |
|     |     | 500(s) | $\delta$ (SO <sub>2</sub> )                                                                                                                 | RSO <sub>3</sub> <sup>-</sup> -containing molecules adsorbed on SeNP                                                                                                                                    |
|     |     | 473    | $\delta$ (SO <sub>2</sub> ); $\delta$ (OH)                                                                                                  | RSO <sub>2</sub> H- and RSO <sub>3</sub> H-containing molecules adsorbed on SeNP                                                                                                                        |
| 464 | 464 | 464    | $\delta$ (OH); $\tau$ (NH <sub>2</sub> )                                                                                                    | Amino acid residues [9]; RSO <sub>2</sub> <sup>-</sup> , RSO <sub>3</sub> <sup>-</sup> -RSO <sub>2</sub> SR-containing molecules; RSO <sub>2</sub> SR-containing molecules adsorbed on SeNP             |
|     |     | 456    | $\delta$ (CNN)                                                                                                                              | RSH-containing molecules                                                                                                                                                                                |
|     |     | 435(s) | $\delta$ SO(OH)                                                                                                                             | RSO <sub>3</sub> H-containing molecules adsorbed on SeNP                                                                                                                                                |
| 408 |     | 409    | $\delta$ (OH); $\delta$ (SO <sub>3</sub> )                                                                                                  | Amino acid residues [9]; RSO <sub>2</sub> H-containing molecules; RSO <sub>2</sub> H-, RSO <sub>3</sub> <sup>-</sup> -, RSSR-containing molecules adsorbed on SeNP                                      |
|     |     | 400(s) | $\delta$ (SO <sub>2</sub> )                                                                                                                 | RSO <sub>2</sub> H- containing molecules adsorbed on SeNP                                                                                                                                               |
|     |     | 386    |                                                                                                                                             |                                                                                                                                                                                                         |
| 375 |     | 369    | $\delta$ (NCC); $\delta$ (CCCO); $\delta$ (SH); $\delta$ (CCN); $\tau$ (NH <sub>3</sub> ); $\delta$ (NH <sub>2</sub> ); backbone vibrations | Amino acid residues [9]; RSH-, and RS-, RSSR-containing molecules; RSO <sub>2</sub> -containing molecules adsorbed on SeNP                                                                              |
|     |     | 358    | $\delta$ (NCC); $\delta$ (CCCO); $\delta$ (SH)                                                                                              | Amino acid residues [9]; RSO <sub>2</sub> -containing molecules adsorbed on SeNP                                                                                                                        |
|     |     | 347    | $\delta$ (NH <sub>2</sub> )                                                                                                                 | RSO <sub>2</sub> -containing molecules adsorbed on SeNP                                                                                                                                                 |
| 337 |     | 337    | $\delta$ (NH <sub>2</sub> ); $\delta$ (OH); $\delta_{ip}$ (CCC)                                                                             | Amino acid residues [9]; RSOSR-, RSO <sub>2</sub> SR-containing molecules; RSH-, RSSR-, RSOSR-, RSO <sub>2</sub> SR-containing molecules adsorbed on SeNP                                               |
|     |     | 325    | $\delta$ (NH <sub>2</sub> ); $\tau$ (COO <sup>-</sup> ); backbone vibrations                                                                | Amino acid residues [9]; RSO <sub>3</sub> H-, RSOSR-, RSO <sub>2</sub> SR-containing molecules; RSH-, RSO <sub>2</sub> <sup>-</sup> -, RSSR-, RSO <sub>2</sub> SR-containing molecules adsorbed on SeNP |
| 316 |     | 316    | $\delta$ (NH <sub>2</sub> ); $\tau$ (COO <sup>-</sup> ); $\beta$ (CN); $\delta$ (SH)                                                        | Amino acid residues [9]; RSO <sub>3</sub> H-, RSOSR-, RSO <sub>2</sub> SR-containing molecules; RSH-, RSO <sub>2</sub> <sup>-</sup> -, RSSR-, RSO <sub>2</sub> SR-containing molecules adsorbed         |

|     |     |                                                                                      | on SeNP                                                                                                                                                                                                                                     |
|-----|-----|--------------------------------------------------------------------------------------|---------------------------------------------------------------------------------------------------------------------------------------------------------------------------------------------------------------------------------------------|
|     | 305 | $\delta$ (SH); $\tau$ (COO <sup>-</sup> )                                            | Amino acid residues [9]; RSH-containing molecules adsorbed on SeNP                                                                                                                                                                          |
| 294 | 290 | $\nu$ (S)OH; $\delta$ (NH <sub>2</sub> ); $\delta$ (CCC); backbone vibrations        | Amino acid residues [9]; RSH-, RSO <sub>2</sub> -, RSO <sub>3</sub> H-, RSO <sub>3</sub> <sup>-</sup> -, RSOSR-, RSO <sub>2</sub> SR-containing molecules; RSO <sub>2</sub> - and RSO <sub>2</sub> SR-containing molecules adsorbed on SeNP |
|     | 280 | $\delta$ (NH <sub>2</sub> ); $\tau$ (NH <sub>2</sub> )                               | Amino acid residues [9]; RS-containing molecules adsorbed on SeNP                                                                                                                                                                           |
|     | 272 | $\delta_{ip}$ (CCN); $\delta$ (SH); backbone vibrations; $\delta$ (NH <sub>2</sub> ) | RSH-, RS-, RSO <sub>3</sub> <sup>-</sup> -, RSSR-, RSOSR-, RSO <sub>2</sub> SR-containing molecules; RSH-, RSO <sub>2</sub> -, RSSR-, RSOSR-, RSO <sub>2</sub> SR-containing molecules adsorbed on SeNP                                     |
| 265 | 266 | $\tau$ (NH <sub>2</sub> ); Se <sub>8</sub> vibration; backbone vibrations            | RSH-, RS-, RSO <sub>2</sub> H-, RSO <sub>2</sub> -, RSO <sub>3</sub> H-, RSO <sub>3</sub> <sup>-</sup> -, RSSR-, RSOSR-, RSO <sub>2</sub> SR-containing molecules adsorbed on SeNP                                                          |
|     | 260 | Se <sub>8</sub> vibration                                                            | RSH-, RSO <sub>2</sub> H-, RSO <sub>2</sub> -, RSO <sub>3</sub> H-, RSO <sub>3</sub> <sup>-</sup> -, RSSR-, RSOSR-, RSO <sub>2</sub> SR-containing molecules                                                                                |
| 249 | 249 | Se <sub>8</sub> vibration                                                            | RS-, RSO <sub>2</sub> -, RSO <sub>3</sub> H-, RSO <sub>3</sub> <sup>-</sup> -, RSOSR-, RSO <sub>2</sub> SR-containing molecules adsorbed on SeNP                                                                                            |

Where  $\nu$ ,  $\delta$ ,  $\beta$ ,  $\rho$ ,  $\tau$ , and  $\omega$  indicate stretching, bending, deformation, rocking, twisting, and wagging, respectively; sciss, oph, as, s, and ip stand for scissoring, out of phase, asymmetric, symmetric, and in plane vibrations.



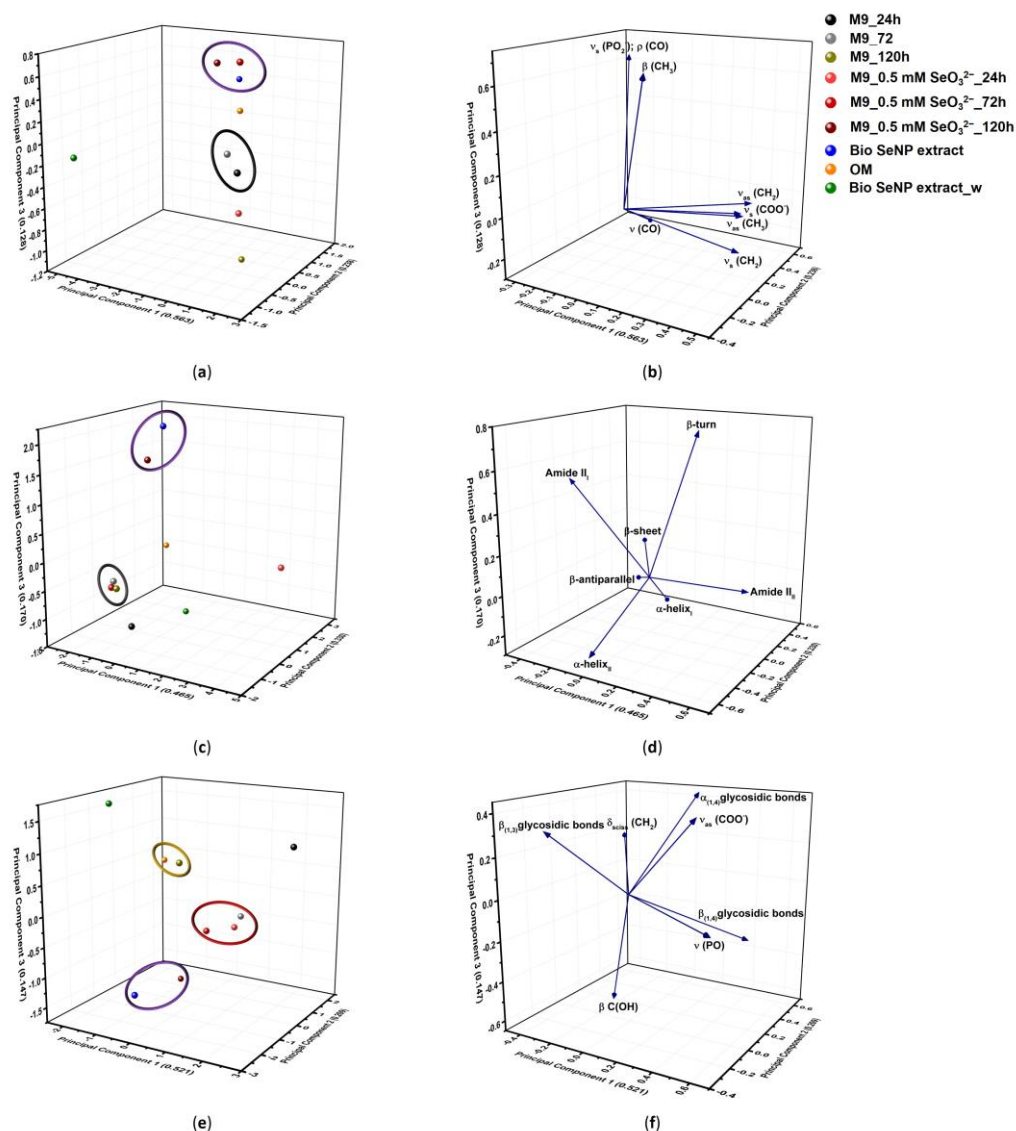

**Figure S3.** Representation of (a, c, and e) score and (b, d, and f) loading plots obtained by performing PCA on IR contributions referring to (a-b) lipids, (c-d) proteins, and (e-f) polysaccharides of *Micrococcus* sp. cells incubated in the presence/absence of SeO<sub>3</sub><sup>2-</sup> and the derived Bio SeNP extracts, alongside OM.

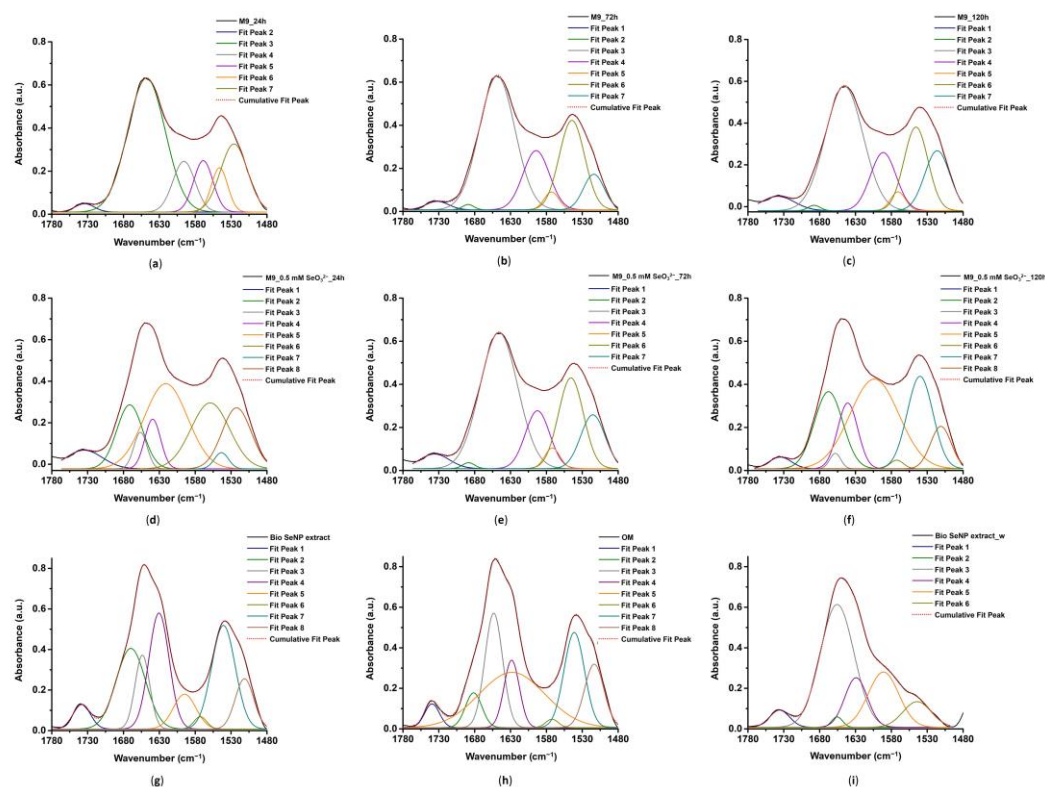

**Figure S4.** ATR-FTIR spectral deconvolution performed on the 1780–1480  $\text{cm}^{-1}$  region for *Micrococcus* sp. cells incubated for (a, d) 24h, (b, e) 72h, and (c, f) 120h with either (a–c) glucose or (d–f) glucose and  $\text{SeO}_3^{2-}$ , (g) Bio SeNP extract, (h) OM, and (i) Bio SeNP extract\_w.

**Table S5.** Deconvolution of ATR-FTIR spectra of *Micrococcus* sp. unchallenged cells in the 1780–1480  $\text{cm}^{-1}$  region.

| M9_24h | w     | A     | M9_72h | w     | A     | M9-120h | w     | A     | Vibrational mode                         |
|--------|-------|-------|--------|-------|-------|---------|-------|-------|------------------------------------------|
| 1734   | 26.74 | 1.293 | 1732   | 31.42 | 1.554 | 1738    | 46.56 | 4.008 | $\nu$ (CO)                               |
|        |       |       | 1670   | 15.72 | 0.484 | 1675    | 16.73 | 0.536 | $\delta$ (NH); $\nu$ (CO)                |
| 1648   | 52.25 | 40.86 | 1649   | 49.49 | 38.51 | 1645    | 52.54 | 39.27 | $\nu$ (CO)                               |
| 1596   | 30.34 | 9.116 | 1594   | 36.71 | 12.65 | 1591    | 35.72 | 12.46 | $\delta_{\text{as}}$ ( $\text{NH}_3^+$ ) |
| 1569   | 26.88 | 8.031 | 1572   | 20.61 | 2.137 | 1570    | 20.84 | 2.352 | $\nu_{\text{as}}$ ( $\text{COO}^-$ )     |
| 1546   | 22.75 | 5.852 | 1544   | 35.25 | 18.34 | 1545    | 33.39 | 16.74 | $\delta_s$ (NH); $\nu$ (CN)              |
| 1526   | 37.85 | 14.98 |        |       |       |         |       |       |                                          |
|        |       |       | 1514   | 28.94 | 5.983 | 1516    | 35.08 | 12.63 | $\delta_s$ ( $\text{NH}_3^+$ )           |

Where  $\nu$ ,  $\delta$ ,  $\text{as}$ , and  $s$  indicates stretching, bending, asymmetric, and symmetric vibrations, respectively.

**Table S6.** Deconvolution of ATR-FTIR spectra of *Micrococcus* sp. cells incubated with  $\text{SeO}_3^{2-}$  in the 1780–1480  $\text{cm}^{-1}$  region.

| M9_0.5 mM<br>$\text{SeO}_3^{2-}$ _24h | w     | A     | M9_0.5 mM<br>$\text{SeO}_3^{2-}$ _72h | w     | A     | M9_0.5 mM<br>$\text{SeO}_3^{2-}$ _120h | w     | A     | Vibrational mode          |
|---------------------------------------|-------|-------|---------------------------------------|-------|-------|----------------------------------------|-------|-------|---------------------------|
| 1734                                  | 50.54 | 5.681 | 1736                                  | 41.63 | 3.533 | 1735                                   | 31.25 | 2.116 | $\nu$ (CO)                |
|                                       |       |       | 1689                                  | 16.91 | 0.581 |                                        |       |       |                           |
| 1671                                  | 36.16 | 13.96 |                                       |       |       | 1668                                   | 39.56 | 17.73 | $\delta$ (NH); $\nu$ (CO) |

|      |       |       |      |       |        |      |       |       |                                                                        |
|------|-------|-------|------|-------|--------|------|-------|-------|------------------------------------------------------------------------|
| 1656 | 18.63 | 4.094 |      |       |        | 1658 | 15.35 | 1.373 | v (CO)                                                                 |
|      |       |       | 1646 | 52.45 | 41.53  |      |       |       | v (CO)                                                                 |
| 1639 | 22.09 | 6.615 |      |       |        | 1640 | 28.11 | 10.74 | v (CO); $\delta$ (NH)                                                  |
| 1621 | 60.29 | 30.97 |      |       |        |      |       |       | v (CO); $\delta$ (NH)                                                  |
|      |       |       | 1592 | 33.90 | 11.40  | 1603 | 68.29 | 35.61 | $\delta_{as}$ (NH <sub>3</sub> <sup>+</sup> )                          |
|      |       |       | 1572 | 21.00 | 2.524  | 1572 | 18.70 | 0.933 | $\nu_{as}$ (COO <sup>-</sup> )                                         |
| 1559 | 53.90 | 21.44 |      |       |        |      |       |       | $\delta_s$ (NH); v (CN)                                                |
| 1543 | 19.64 | 1.915 | 1546 | 34.88 | 18.39  | 1540 | 35.92 | 19.32 | $\delta_s$ (NH); v (CN)                                                |
| 1522 | 40.69 | 14.98 |      |       |        |      |       |       | $\delta_s$ (NH); v (CN)                                                |
|      |       |       | 1515 | 34.07 | 10.659 | 1511 | 28.69 | 7.073 | $\delta_s$ (NH <sub>3</sub> <sup>+</sup> );<br>$\delta_s$ (NH); v (CN) |

Where v,  $\delta$ , as, and s indicates stretching, bending, asymmetric, and symmetric vibrations, respectively.

**Table S7.** Deconvolution of ATR-FTIR spectra of biogenic SeNP extracts and OM in the 1780–1480 cm<sup>-1</sup> region.

| Bio SeNP<br>extract | w     | A     | OM   | w     | A     | Bio SeNP<br>extract_w | w     | A     | Vibrational<br>mode                           |
|---------------------|-------|-------|------|-------|-------|-----------------------|-------|-------|-----------------------------------------------|
| 1738                | 24.22 | 3.675 | 1739 | 20.72 | 3.033 | 1735                  | 27.61 | 2.950 | v (CO)                                        |
| 1670                | 40.74 | 20.29 | 1681 | 22.95 | 4.924 |                       |       |       | $\delta$ (NH); v (CO)                         |
| 1654                | 20.36 | 9.292 | 1653 | 24.74 | 17.49 | 1655                  | 15.22 | 0.985 | v (CO)                                        |
|                     |       |       |      |       |       | 1650                  | 47.01 | 35.70 | v (CO)                                        |
| 1630                | 28.19 | 20.21 | 1628 | 21.40 | 8.90  | 1629                  | 31.53 | 9.670 | v (CO); $\delta$ (NH)                         |
|                     |       |       | 1625 | 91.94 | 31.37 |                       |       |       | v (CO); $\delta$ (NH)                         |
| 1595                | 31.53 | 6.782 |      |       |       | 1590                  | 42.53 | 14.54 | $\delta_{as}$ (NH <sub>3</sub> <sup>+</sup> ) |
| 1573                | 17.79 | 1.354 | 1572 | 17.60 | 0.909 |                       |       |       | $\nu_{as}$ (COO <sup>-</sup> )                |
| 1540                | 32.89 | 21.06 | 1541 | 28.49 | 16.75 | 1544                  | 39.31 | 6.246 | $\delta_s$ (NH); v (CN)                       |
| 1511                | 25.76 | 8.000 | 1513 | 27.07 | 10.61 |                       |       |       | $\delta_s$ (NH <sub>3</sub> <sup>+</sup> )    |

Where v,  $\delta$ , as, and s indicates stretching, bending, asymmetric, and symmetric vibrations, respectively.

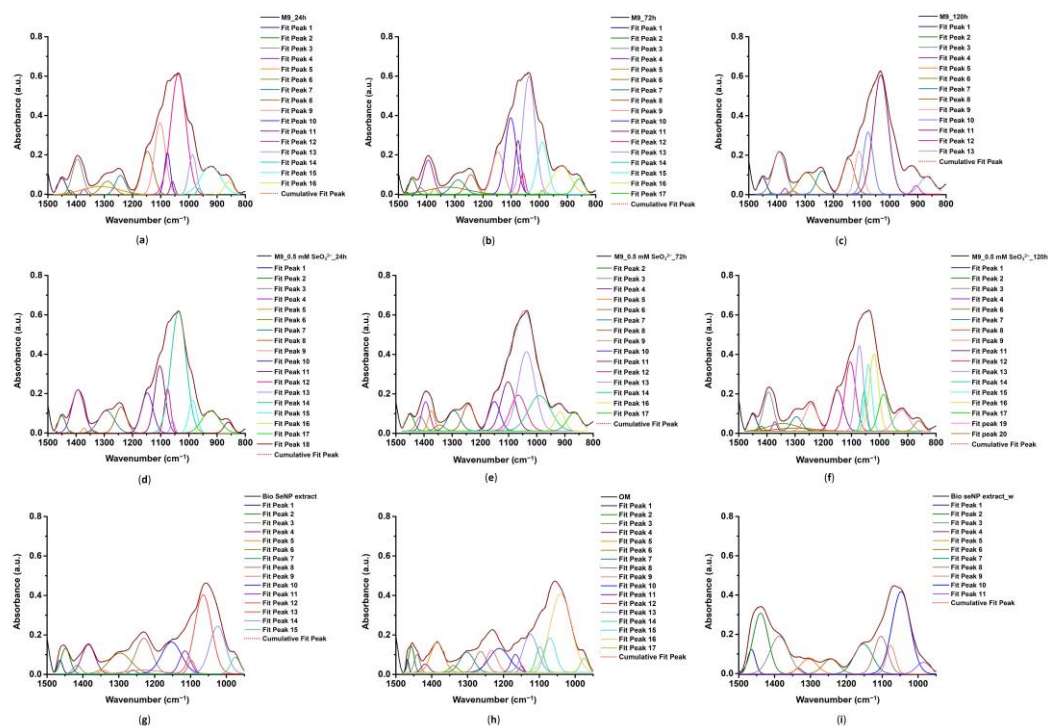

**Figure S5.** ATR-FTIR spectral deconvolution performed on the 1500–800  $\text{cm}^{-1}$  region for *Mi-crococcus* sp. cells incubated for (a, d) 24h, (b, e) 72h, and (c, f) 120h with either (a–c) glucose or (d–f) glucose and  $\text{SeO}_3^{2-}$ , (g) Bio SeNP extract, (h) OM, and (i) Bio SeNP extract\_w.

**Table S8.** Deconvolution of ATR-FTIR spectra of *Micrococcus* sp. unchallenged cells in the 1500–800 cm<sup>−1</sup> region.

| M9_24h | w     | A     | M9_72h | w      | A     | M9_120h | w     | A     | Vibrational mode                                                                                                                              |
|--------|-------|-------|--------|--------|-------|---------|-------|-------|-----------------------------------------------------------------------------------------------------------------------------------------------|
|        |       |       | 1468   | 5.852  | 0.073 |         |       |       | $\delta$ (CH <sub>2</sub> ); $\delta$ (CH <sub>3</sub> )                                                                                      |
| 1450   | 28.48 | 2.977 | 1450   | 24.19  | 2.377 | 1451    | 28.14 | 3.032 | $\delta_{\text{sciss}}$ (CH <sub>2</sub> ); $\delta$ (OH); $\nu$ CC(O); $\nu_s$ (COO <sup>−</sup> )                                           |
| 1420   | 16.65 | 0.455 | 1421   | 22.14  | 0.927 | 1420    | 10.16 | 0.067 | $\nu_s$ (COO <sup>−</sup> )                                                                                                                   |
| 1395   | 37.14 | 8.421 | 1394   | 35.58  | 7.734 | 1392    | 45.15 | 12.13 | $\delta$ (CH); $\delta$ (OH); $\delta$ (COH); $\beta$ (CH <sub>3</sub> ); $\nu$ (CN)                                                          |
| 1371   | 15.11 | 0.558 | 1371   | 14.90  | 0.549 | 1371    | 14.62 | 0.539 | $\beta$ (CH <sub>3</sub> )                                                                                                                    |
|        |       |       |        |        |       | 1340    | 18.93 | 0.337 | $\beta$ C(OH); $\delta$ (OH); $\delta$ (CH)                                                                                                   |
| 1312   | 130.1 | 6.811 | 1322   | 1318.8 | 6.297 |         |       |       |                                                                                                                                               |
| 1292   | 46.68 | 4.016 | 1288   | 47.22  | 4.319 | 1294    | 56.32 | 7.672 | $\omega$ (CH <sub>2</sub> ); $\nu_{\text{as(oph)}}$ (CH); $\nu$ (COC); $\nu$ (CCO); $\delta$ (OH)                                             |
| 1242   | 36.05 | 4.437 | 1242   | 36.21  | 4.536 | 1240    | 38.43 | 5.642 | $\beta$ (NH); $\nu_{\text{as}}$ (PO <sub>2</sub> <sup>−</sup> )                                                                               |
| 1146   | 41.14 | 11.37 | 1147   | 40.83  | 11.11 | 1146    | 40.53 | 9.179 | $\nu_{\text{as}}$ (COC); $\delta$ (CH <sub>2</sub> ); $\delta$ (CH); $\delta$ (NH <sub>2</sub> )                                              |
| 1102   | 38.27 | 17.52 | 1101   | 39.47  | 19.21 | 1108    | 29.06 | 7.899 | $\nu_{\text{as}}$ (COC); $\nu$ (CC); $\nu$ (CO); $\delta$ (COH); $\nu$ P(OH) <sub>2</sub>                                                     |
| 1076   | 20.93 | 5.60  | 1075   | 21.75  | 7.435 | 1076    | 34.98 | 13.76 | $\nu$ (CO); $\nu$ (CC); $\nu$ (COH); $\delta$ (COC); $\nu$ (NH <sub>3</sub> <sup>+</sup> )                                                    |
| 1058   | 15.53 | 1.319 | 1058   | 17.02  | 2.304 |         |       |       | $\nu$ (CC); $\nu$ (CO); $\delta$ (COH); $\nu_s$ (PO <sub>2</sub> <sup>−</sup> )                                                               |
| 1037   | 53.58 | 41.26 | 1037   | 43.41  | 32.61 | 1032    | 52.90 | 39.65 | $\nu$ (PO); $\nu$ (SH); $\nu$ (SO)                                                                                                            |
| 987    | 27.15 | 6.935 | 989    | 10.20  | 0.283 |         |       |       | $\delta$ (NH <sub>2</sub> ); $\delta$ (HNCC); $\nu$ (CO); $\nu_s$ (PO <sub>2</sub> <sup>−</sup> ); $\nu$ (CO); $\nu$ (CC)                     |
|        |       |       | 985    | 37.81  | 12.57 |         |       |       | $\delta$ (NH <sub>2</sub> ); $\delta$ (HNCC); $\nu$ (CO); $\nu_s$ (PO <sub>2</sub> <sup>−</sup> ); $\nu$ (CO); $\nu$ (CC)                     |
| 964    | 15.47 | 0.610 |        |        |       |         |       |       | $\delta$ (NH <sub>2</sub> ); $\delta$ (HNCC)                                                                                                  |
| 922    | 71.42 | 12.96 | 920    | 62.20  | 11.31 |         |       |       | $\delta$ (=CH); $\tau$ (CH <sub>2</sub> ); $\nu_s$ (PO <sub>4</sub> <sup>3−</sup> ); $\delta$ (NH <sub>2</sub> ); $\delta$ (CH <sub>2</sub> ) |
|        |       |       |        |        |       | 906     | 24.13 | 1.3   |                                                                                                                                               |
| 858    | 33.04 | 2.797 | 859    | 35.32  | 3.427 | 867     | 54.04 | 5.896 | $\delta$ (NH <sub>2</sub> ); $\nu$ (CC); $\nu$ (CN)                                                                                           |

Where  $\nu$ ,  $\delta$ ,  $\beta$ ,  $\nu$ , and  $\omega$  indicate stretching, bending, deformation, rocking, and wagging, respectively; sciss, oph, as, s, and ip stand for scissoring, out of phase, asymmetric, symmetric, and in plane vibrations.

**Table S9.** Deconvolution of ATR-FTIR spectra of *Micrococcus* sp. cells incubated with  $\text{SeO}_3^{2-}$  in the 1500–800  $\text{cm}^{-1}$  region.

| M9_0.5 mM<br>SeO <sub>3</sub> <sup>2-</sup> _24h | w     | A     | M9_0.5 mM<br>SeO <sub>3</sub> <sup>2-</sup> _72h | w     | A      | M9_0.5 mM<br>SeO <sub>3</sub> <sup>2-</sup> _120h | w     | A     | Vibrational mode                                                                                                                                       |
|--------------------------------------------------|-------|-------|--------------------------------------------------|-------|--------|---------------------------------------------------|-------|-------|--------------------------------------------------------------------------------------------------------------------------------------------------------|
| 1469                                             | 4.836 | 0.053 |                                                  |       |        |                                                   |       |       | $\delta$ (CH <sub>2</sub> ); $\delta$ (CH <sub>3</sub> )                                                                                               |
| 1451                                             | 26.25 | 2.894 | 1450                                             | 28.95 | 3.056  | 1450                                              | 26.70 | 2.896 | $\delta_{\text{sciss}}$ (CH <sub>2</sub> ); $\delta$ (OH); $\nu$ CC(O); $\nu_s$ (COO <sup>-</sup> )                                                    |
| 1421                                             | 13.07 | 0.170 |                                                  |       |        |                                                   |       |       | $\nu_s$ (COO <sup>-</sup> )                                                                                                                            |
|                                                  |       |       | 1413                                             | 29.19 | 2.643  | 1415                                              | 17.65 | 0.570 | $\nu_s$ (COO <sup>-</sup> )                                                                                                                            |
| 1393                                             | 43.29 | 11.93 | 1394                                             | 28.92 | 11.368 | 1390                                              | 35.80 | 8.879 | $\delta$ (CH); $\delta$ (OH); $\delta$ (COH); $\beta$ (CH <sub>3</sub> ); $\nu$ (CN)                                                                   |
| 1371                                             | 14.04 | 0.461 | 1373                                             | 22.64 | 2.917  | 1372                                              | 15.90 | 0.952 | $\beta$ (CH <sub>3</sub> ); $\delta$ (CH); $\delta$ (OH)                                                                                               |
| 1339                                             | 18.35 | 0.308 | 1344                                             | 33.63 | 1.301  | 1342                                              | 103.3 | 5.042 | $\beta$ C(OH); $\delta$ (OH); $\delta$ (CH)                                                                                                            |
| 1292                                             | 55.53 | 7.941 | 1294                                             | 44.83 | 5.786  | 1303                                              | 39.41 | 4.330 | $\omega$ (CH <sub>2</sub> ); $\rho_{\text{as(oph)}}$ (CH); $\nu$ (COC); $\nu$ (CCO); $\delta$ (OH)                                                     |
|                                                  |       |       |                                                  |       |        | 1276                                              | 136.2 | 2.765 | $\nu$ (CO); $\delta$ (S)OH; $\delta$ (NH <sub>2</sub> ); $\delta$ (CH <sub>2</sub> ); $\delta$ (OH); $\nu_{\text{as}}$ (PO <sub>2</sub> <sup>-</sup> ) |
| 1241                                             | 38.92 | 6.445 | 1242                                             | 39.86 | 6.772  | 1243                                              | 43.60 | 7.644 | $\beta$ (NH); $\nu_{\text{as}}$ (PO <sub>2</sub> <sup>-</sup> )                                                                                        |
|                                                  |       |       | 1220                                             | 0.023 | 232.2  | 1223                                              | 0.202 | 3.300 | $\nu$ CO(H) $\delta$ (COH); $\nu$ (CO); $\nu_{\text{as}}$ (PO <sub>2</sub> <sup>-</sup> ); $\nu$ (CN);                                                 |
|                                                  |       |       |                                                  |       |        |                                                   |       |       | $\delta$ (S)OH; $\delta$ (CH <sub>2</sub> )                                                                                                            |
| 1206                                             | 11.12 | 0.078 |                                                  |       |        |                                                   |       |       | $\nu$ (CO); $\delta$ (CH <sub>2</sub> ); $\delta$ (CH); $\delta$ (OH)                                                                                  |
| 1148                                             | 40.86 | 10.46 | 1150                                             | 40.06 | 7.479  | 1150                                              | 41.20 | 10.74 | $\nu_{\text{as}}$ (COC); $\delta$ (CH <sub>2</sub> ); $\delta$ (CH); $\delta$ (NH <sub>2</sub> )                                                       |
| 1102                                             | 36.70 | 15.72 | 1101                                             | 50.11 | 15.68  | 1104                                              | 37.30 | 16.43 | $\nu_{\text{as}}$ (COC); $\nu$ (CC); $\nu$ (CO); $\delta$ (COH); $\nu$ P(OH) <sub>2</sub>                                                              |
| 1075                                             | 21.97 | 6.195 | 1066                                             | 55.63 | 12.69  | 1072                                              | 27.65 | 14.99 | $\nu$ (CO); $\nu$ (CC); $\nu$ (COH); $\delta$ (COC); $\rho$ (NH <sub>3</sub> <sup>+</sup> ); $\nu$ (SO)                                                |
| 1058                                             | 15.22 | 1.191 |                                                  |       |        | 1055                                              | 18.59 | 4.663 | $\nu$ (CC); $\nu$ (CO); $\delta$ (COH); $\nu$ (SO); $\nu_s$ (PO <sub>2</sub> <sup>-</sup> )                                                            |
| 1037                                             | 53.65 | 41.51 | 1036                                             | 59.66 | 29.99  | 1040                                              | 23.48 | 9.951 | $\nu$ (PO); $\nu$ (SH); $\nu$ (SO)                                                                                                                     |
|                                                  |       |       |                                                  |       |        | 1020                                              | 32.36 | 15.89 | $\nu$ (POC); $\delta$ (NH <sub>2</sub> )                                                                                                               |
| 986                                              | 28.81 | 5.980 | 990                                              | 77.64 | 17.44  | 985                                               | 35.91 | 8.389 | $\delta$ (NH <sub>2</sub> ); $\delta$ (HNCC); $\nu$ (CO); $\nu_s$ (PO <sub>2</sub> <sup>-</sup> );                                                     |
|                                                  |       |       |                                                  |       |        |                                                   |       |       | $\nu$ (CO); $\nu$ (CC)                                                                                                                                 |
| 963                                              | 13.96 | 0.381 |                                                  |       |        |                                                   |       |       | $\delta$ (NH <sub>2</sub> ); $\delta$ (HNCC)                                                                                                           |
|                                                  |       |       |                                                  |       |        | 940                                               | 240.6 | 3.169 |                                                                                                                                                        |
| 922                                              | 62.24 | 8.829 | 917                                              | 34.48 | 4.227  | 921                                               | 51.53 | 6.940 | $\delta$ (=CH); $\tau$ (CH <sub>2</sub> ); $\nu_s$ (PO <sub>4</sub> <sup>3-</sup> ); $\delta$ (SH); $\nu$ (SO); $\delta$ (NH <sub>2</sub> );           |
|                                                  |       |       |                                                  |       |        |                                                   |       |       | $\delta$ (CH <sub>2</sub> )                                                                                                                            |
| 860                                              | 29.97 | 2.098 | 866                                              | 50.34 | 5.842  | 861                                               | 31.44 | 2.060 | $\delta$ (NH <sub>2</sub> ); $\nu$ (CC); $\nu$ (CN)                                                                                                    |

Where  $\nu$ ,  $\delta$ ,  $\beta$ ,  $\rho$ , and  $\omega$  indicate stretching, bending, deformation, rocking, and wagging, respectively; sciss, oph, as, s, and ip stand for scissoring, out of phase, asymmetric, symmetric, and in plane vibrations.

**Table S10.** Deconvolution of ATR-FTIR spectra of biogenic SeNP extracts and OM in the 1500-950 cm<sup>-1</sup> region.

| Bio SeNP<br>extract | w     | A     | OM   | w     | A     | Bio SeNP<br>extract_w | w     | A     | Vibrational mode                                                                                                                                          |
|---------------------|-------|-------|------|-------|-------|-----------------------|-------|-------|-----------------------------------------------------------------------------------------------------------------------------------------------------------|
| 1464                | 14.59 | 1.263 | 1468 | 7.498 | 0.624 | 1464                  | 21.87 | 3.420 | $\delta$ (CH <sub>2</sub> ); $\delta$ (CH <sub>3</sub> )                                                                                                  |
|                     |       |       | 1457 | 14.99 | 2.491 |                       |       |       | $\beta_{\text{sciss}}$ (CH <sub>2</sub> ); $\delta_{\text{as}}$ (CH <sub>3</sub> ); $\rho_{\text{as(oph)}}$ (CH); $\delta$ (OH); $\nu$ CC(O)              |
| 1448                | 24.84 | 4.015 | 1441 | 15.65 | 1.778 | 1438                  | 41.79 | 16.19 | $\delta$ (OH); $\nu$ CC(O)                                                                                                                                |
| 1416                | 22.36 | 1.205 | 1418 | 21.19 | 1.140 |                       |       |       | $\nu_{\text{s}}$ (COO <sup>-</sup> )                                                                                                                      |
| 1385                | 36.38 | 6.738 | 1385 | 36.40 | 6.969 | 1386                  | 52.58 | 12.55 | $\delta$ (CH); $\delta$ (OH); $\delta$ (COH); $\beta$ (CH <sub>3</sub> ); $\nu$ (CN)                                                                      |
| 1342                | 18.11 | 0.402 | 1339 | 23.07 | 1.023 | 1333                  | 21.58 | 0.777 | $\beta$ C(OH); $\delta$ (OH); $\delta$ (CH)                                                                                                               |
| 1296                | 61.55 | 8.045 | 1302 | 38.94 | 5.022 | 1304                  | 46.08 | 4.393 | $\omega$ (CH <sub>2</sub> ); $\rho_{\text{as(oph)}}$ (CH); $\nu$ (COC); $\nu$ (CCO); $\delta$ (OH)                                                        |
| 1260                | 16.38 | 0.395 | 1264 | 30.58 | 4.070 |                       |       |       | $\nu$ (CO); $\delta$ (S)OH                                                                                                                                |
|                     |       |       |      |       |       | 1242                  | 44.49 | 4.208 | $\beta$ (NH); $\nu_{\text{as}}$ (PO <sub>2</sub> <sup>-</sup> )                                                                                           |
| 1229                | 44.80 | 10.08 | 1233 | 30.75 | 4.293 |                       |       |       | $\nu$ CO(H) $\delta$ (COH); $\nu$ (CO); $\nu_{\text{as}}$ (PO <sub>2</sub> <sup>-</sup> ); $\nu$ (CN); $\delta$ (S)OH; $\delta$ (CH <sub>2</sub> )        |
| 1226                | 60.58 | 2.126 |      |       |       |                       |       |       | $\nu$ CO(H) $\delta$ (COH); $\nu$ (CO); $\nu_{\text{as}}$ (PO <sub>2</sub> <sup>-</sup> ); $\nu$ (CN); $\delta$ (S)OH; $\delta$ (CH <sub>2</sub> )        |
|                     |       |       | 1211 | 55.61 | 8.460 |                       |       |       | $\nu$ (CO); $\delta$ (CH <sub>2</sub> ); $\delta$ (CH); $\delta$ (OH)                                                                                     |
|                     |       |       | 1166 | 24.27 | 2.758 |                       |       |       | $\nu$ (CN); $\rho_{\text{as(oph)}}$ (CH); $\rho$ (NH); $\nu$ (CO); $\delta$ (S)OH; $\delta$ (CH); $\nu$ (CC)                                              |
| 1153                | 55.17 | 11.09 | 1150 | 12.71 | 0.564 | 1152                  | 51.15 | 9.825 | $\nu_{\text{as}}$ (COC); $\delta$ (CH <sub>2</sub> ); $\delta$ (CH); $\delta$ (NH <sub>2</sub> )                                                          |
|                     |       |       | 1125 | 40.63 | 9.824 |                       |       |       | $\delta_{\text{ip}}$ (OH)                                                                                                                                 |
| 1115                | 30.06 | 4.358 |      |       |       |                       |       |       | $\rho$ (CNH <sub>3</sub> ); $\omega$ (CH <sub>2</sub> ); $\nu_{\text{as}}$ (PO <sub>2</sub> <sup>-</sup> )                                                |
| 1098                | 18.85 | 1.602 | 1098 | 22.96 | 3.732 | 1103                  | 37.22 | 8.934 | $\nu_{\text{as}}$ (COC); $\nu$ (CC); $\nu$ (CO); $\delta$ (COH); $\nu$ P(OH) <sub>2</sub>                                                                 |
| 1065                | 49.97 | 23.56 | 1069 | 31.27 | 6.810 | 1076                  | 25.31 | 4.550 | $\nu$ (CO); $\nu$ (CC); $\nu$ (COH); $\delta$ (COC); $\rho$ (NH <sub>3</sub> <sup>+</sup> ); $\nu$ (SO); $\nu_{\text{s}}$ (PO <sub>2</sub> <sup>-</sup> ) |
|                     |       |       | 1040 | 58.44 | 29.24 | 1047                  | 50.59 | 26.58 | $\nu$ (PO); $\nu$ (SH); $\nu$ (SO)                                                                                                                        |
| 1024                | 44.07 | 13.31 |      |       |       |                       |       |       | $\nu$ (POC)                                                                                                                                               |
| 975                 | 26.12 | 2.751 | 974  | 21.58 | 1.949 | 984                   | 39.18 | 2.902 | $\delta$ (NH <sub>2</sub> ); $\delta$ (HNCC); $\nu$ (CO); $\nu_{\text{s}}$ (PO <sub>2</sub> <sup>-</sup> ); $\nu$ (CO); $\nu$ (CC)                        |

Where  $\nu$ ,  $\delta$ ,  $\beta$ ,  $\rho$ , and  $\omega$  indicate stretching, bending, deformation, rocking, and wagging, respectively; sciss, oph, as, s, and ip stand for scissoring, out of phase, asymmetric, symmetric, and in plane vibrations.

## References

1. Tugarova, A.V.; Mamchenkova, P.V.; Dylatova, Y.A.; Kamnev, A.A. FTIR and Raman spectroscopic studies of selenium nanoparticles synthesized by the bacterium *Azospirillum thiophilum*. *Spectrochim. Acta A Mol. Biomol. Spectrosc.* **2018**, *192*, 458–463. <https://doi.org/10.1016/j.saa.2017.11.050>
2. Faghihzadeh, F.; Anaya, N.M.; Schiffman, L.A.; Oyanedel-Craver, V. Fourier transform infrared spectroscopy to assess molecular-level changes in microorganisms exposed to nanoparticles. *Nanotechnol. Environ. Eng.* **2016**, *1*, 1. <https://doi.org/10.1007/s41204-016-0001-8>
3. Lasch, P.; Naumann, D. Infrared spectroscopy in microbiology. In: *Encyclopedia of Analytical Chemistry*. Meyers, R.A., Ed.; Wiley Online Library, 2015. <https://doi.org/10.1002/9780470027318.a01117.pub2>
4. Jiang, W.; Saxena, A.; Song, B.; Ward, B.B.; Beveridge, T.J.; Myneni, S.C.B. Elucidation of functional groups on Gram-positive and Gram-negative bacterial surfaces using Infrared spectroscopy. *Langmuir* **2004**, *20*, 11433–11442. <https://doi.org/10.1021/la049043+>
5. Buszewski, B.; Dziubakiewicz, E.; Pomastowski, P.; Hryniewicz, K.; Ploszaj-Pyrek, J.; Talik, E.; Kramer, M.; Albert, K. Assignment of functional groups in Gram-positive bacteria. *J. Anal. Bioanal. Tech.* **2015**, *6*, 1. <https://doi.org/10.4172/2155-9872.1000232>
6. Otari, S.V.; Patil, R.M.; Ghosh, S.J.; Thorat, N.D.; Pawar, S.H. Intracellular synthesis of silver nanoparticle by actinobacteria and its antimicrobial activity. *Spectrochim. Acta A Mol. Biomol. Spectrosc.* **2015**, *136*, 1175–1180. <http://dx.doi.org/10.1016/j.saa.2014.10.003>
7. Nikonenko, N.A.; Buslov, D.K.; Sushko, N.J.; Zhbankov, R.G. Investigation of stretching vibrations of glycosidic linkages in disaccharides and polysaccharides with use of IR spectra deconvolution. *Biopolymers* **2000**, *57*, 257–262. [https://doi.org/10.1002/1097-0282\(2000\)57:4<257::AID-BIP7>3.0.CO;2-3](https://doi.org/10.1002/1097-0282(2000)57:4<257::AID-BIP7>3.0.CO;2-3)
8. Nadtochenko, V.A.; Rincon, A.G.; Stanca, S.E.; Kiwi, J. Dynamics of *E. coli* membrane cell peroxidation during TiO<sub>2</sub> photocatalysis studied by ATR-FTIR spectroscopy and AFM microscopy. *J. Photochem. Photobiol. A Chem.* **2005**, *169*, 131–137. <https://doi.org/10.1016/j.jphotochem.2004.06.011>
9. Mohamed, M.E.; Mohammed, A.M.A. Experimental and computation vibration study of amino acids. *Inter. Lett. Chem. Phys. Astr.* **2013**, *10*, 1–17. <https://doi.org/10.18052/www.scipress.com/ILCPA.15.1>
10. Kamnev, A.A.; Mamchenkova, P.V.; Dylatova, Y.A.; Tugarova, A.V. FTIR spectroscopic studies of selenite reduction by cells of the rhizobacterium *Azospirillum brasilense* Sp7 and the formation of selenium nanoparticles. *J. Mol. Struct.* **2017**, *1140*, 106–112. <http://dx.doi.org/10.1016/j.molstruc.2016.12.003>
11. Kurihara, T.; Noda, Y.; Takegoshi, K. Capping structure of ligand-cysteine on CdSe magic-sized clusters. *ACS Omega* **2019**, *4*, 3476–3483. <https://doi.org/10.1021/acsomega.8b02752>
12. Barth, A. The infrared absorption of amino acid side chains. *Progr. Biophys. Mol. Biol.* **2000**, *74*, 141–173. [https://doi.org/10.1016/S0079-6107\(00\)00021-3](https://doi.org/10.1016/S0079-6107(00)00021-3)
13. Garip, S.; Gozen, A.C.; Severcan, F. Use of Fourier transform infrared spectroscopy for rapid comparative analysis of *Bacillus* and *Micrococcus* isolates. *Food Chem.* **2009**, *113*, 1301–1307. <https://doi.org/10.1016/j.foodchem.2008.08.063>
14. Wiercigroch, E.; Szafraniec, E.; Czamara, K.; Pacia, M.Z.; Majzner, K.; Kochan, K.; Kaczor, A.; Baranska, M.; Malek, K. Raman and infrared spectroscopy of carbohydrates: a review. *Spectrochim. Acta A Mol. Biomol. Spectrosc.* **2017**, *185*, 317–335. <http://dx.doi.org/10.1016/j.saa.2017.05.045>
15. Kamnev, A.A. FTIR spectroscopic studies of bacterial cellular responses to environmental factors, plant-bacterial interactions and signalling. *Spectroscopy* **2008**, *22*, 83–85. <https://doi.org/10.3233/SPE-2008-0329>
16. Tanaka, I.; Tellez, C.; Oliveira, R.P.D.; Fortes, S.A.; Soto, C.A.T. Analysis of the Fourier Transform Infrared (Attenuated Total Reflection) spectra in the study of multi-sensitive bacteria of the genus *Klebsiella* sp. using a fine copper sheet as sensor. *J. Phys. Chem. Res.* **2020**, *2*, 115. <https://doi.org/10.36266/JPCR/115>
17. Heacock, R.A.; Marion, L. The Infrared spectra of secondary amines and their salts. *Can. J. Chem.* **1956**, 1782–1795.
